# Supplementary material for: Untargeted Metabolomics Identifies Potential Hypertrophic Cardiomyopathy Biomarkers in Carriers of MYBPC3 Founder Variants
Source: MDPI journal article supplement (doi:10.3390/ijms24044031), 2023-02-17
Supplement: s1 [file s1]

**Untargeted Metabolomics Identifies Potential Hypertrophic Cardiomyopathy Biomarkers  
in Carriers of Founder Truncating *MYBPC3* Variants**

*Supplementary Materials*

M. Jansen et al. (2023)

**Table S1. Relatedness between subjects & genetic testing**

| Family                                | Subject | Group             | Age | Sex | Reason for genetic testing | Type of genetic testing    |
|---------------------------------------|---------|-------------------|-----|-----|----------------------------|----------------------------|
| <b>MYBPC3 c.2373dupG p.(Trp792fs)</b> |         |                   |     |     |                            |                            |
| F001                                  | 1       | No/mild phenotype | 66  | M   | Index patient              | NGS panel                  |
| F002                                  | 2       | No/mild phenotype | 64  | M   | Family member              | Variant-specific           |
| F003                                  | 3       | Severe            | 53  | M   | Index patient              | Sanger sequencing (MYBPC3) |
| F004                                  | 4       | Severe            | 75  | F   | Index patient              | NGS panel                  |
| F005                                  | 5       | Severe            | 72  | M   | Index patient              | NGS panel                  |
| F006                                  | 6       | No/mild phenotype | 63  | F   | Family member              | Variant-specific           |
| F007                                  | 7       | Genotype-negative | 52  | F   | Family member              | Variant-specific           |
| F008                                  | 8       | Severe            | 20  | M   | Family member              | Variant-specific           |
| F009                                  | 9       | Severe            | 49  | M   | Index patient              | NGS panel                  |
| F010                                  | 10      | Severe            | 44  | F   | Index patient              | Sanger sequencing (MYBPC3) |
|                                       | 11      | Severe            | 73  | M   | Family member              | Variant-specific           |
| F011                                  | 12      | No/mild phenotype | 63  | F   | Family member              | Variant-specific           |
|                                       | 13      | No/mild phenotype | 70  | F   | Family member              | Variant-specific           |
| F012                                  | 14      | No/mild phenotype | 70  | M   | Family member              | Variant-specific           |
|                                       | 15      | No/mild phenotype | 75  | M   | Family member              | Variant-specific           |
| F013                                  | 16      | Genotype-negative | 66  | M   | Family member              | Variant-specific           |
| F014                                  | 17      | Genotype-negative | 23  | M   | Family member              | Variant-specific           |
| F015                                  | 18      | Severe            | 41  | M   | Index patient              | NGS panel                  |
|                                       | 19      | Severe            | 37  | M   | Family member              | Variant-specific           |
| F016                                  | 20      | Severe            | 67  | M   | Index patient              | Sanger sequencing (MYBPC3) |
| F017                                  | 21      | No/mild phenotype | 38  | M   | Family member              | Variant-specific           |
|                                       | 22      | Genotype-negative | 60  | F   | Family member              | Variant-specific           |
| F018                                  | 23      | Severe            | 58  | M   | Index patient              | Sanger sequencing (MYBPC3) |
| F019                                  | 24      | Genotype-negative | 67  | F   | Family member              | Variant-specific           |
|                                       | 25      | Genotype-negative | 46  | M   | Family member              | Variant-specific           |
| F020                                  | 26      | No/mild phenotype | 57  | M   | Family member              | Variant-specific           |
| F021                                  | 27      | Severe            | 73  | F   | Family member              | Variant-specific           |
| F022                                  | 28      | No/mild phenotype | 30  | F   | Family member              | Variant-specific           |
| F023                                  | 29      | Severe            | 26  | F   | Index patient              | NGS panel                  |
| F024                                  | 30      | No/mild phenotype | 72  | F   | Family member              | Variant-specific           |
|                                       | 31      | No/mild phenotype | 48  | F   | Family member              | Variant-specific           |
| F025                                  | 32      | No/mild phenotype | 57  | M   | Family member              | Variant-specific           |
| F026                                  | 33      | No/mild phenotype | 23  | M   | Family member              | Variant-specific           |
| F027                                  | 34      | Severe            | 68  | M   | Index patient              | NGS panel                  |
| F028                                  | 35      | Severe            | 55  | M   | Index patient              | NGS panel                  |
| F029                                  | 36      | Genotype-negative | 59  | M   | Family member              | Variant-specific           |

| Family                                      | Subject | Group             | Age | Sex | Reason for genetic testing | Type of genetic testing          |
|---------------------------------------------|---------|-------------------|-----|-----|----------------------------|----------------------------------|
| F030                                        | 37      | Severe            | 72  | F   | Family member              | Variant-specific                 |
|                                             | 38      | Severe            | 69  | M   | Family member              | Variant-specific                 |
| F031                                        | 39      | No/mild phenotype | 28  | M   | Index patient              | NGS panel                        |
| F032                                        | 40      | No/mild phenotype | 24  | F   | Family member              | Variant-specific                 |
|                                             | 41      | No/mild phenotype | 26  | M   | Family member              | Variant-specific                 |
|                                             | 42      | No/mild phenotype | 54  | F   | Family member              | Variant-specific                 |
| F033                                        | 43      | Genotype-negative | 40  | M   | Family member              | Variant-specific                 |
| F034                                        | 44      | No/mild phenotype | 69  | M   | Family member              | Variant-specific                 |
| F035                                        | 45      | No/mild phenotype | 67  | F   | Family member              | Variant-specific                 |
| F036                                        | 46      | No/mild phenotype | 72  | M   | Index patient              | Sanger sequencing (MYBPC3, MYH7) |
|                                             | 47      | No/mild phenotype | 39  | M   | Family member              | Variant-specific                 |
| F037                                        | 48      | Severe            | 54  | F   | Index patient              | Sanger sequencing (MYBPC3)       |
| F038                                        | 49      | Severe            | 77  | M   | Index patient              | Variant-specific                 |
| F039                                        | 50      | No/mild phenotype | 60  | F   | Family member              | Variant-specific                 |
| F040                                        | 51      | No/mild phenotype | 38  | F   | Family member              | Variant-specific                 |
|                                             | 52      | No/mild phenotype | 52  | M   | Family member              | Variant-specific                 |
| F041                                        | 53      | Genotype-negative | 72  | M   | Family member              | Variant-specific                 |
| F042                                        | 54      | Severe            | 71  | F   | Index patient              | Variant-specific                 |
|                                             | 55      | Severe            | 68  | F   | Family member              | Variant-specific                 |
|                                             | 56      | No/mild phenotype | 31  | M   | Family member              | Variant-specific                 |
|                                             | 57      | Severe            | 36  | M   | Family member              | Variant-specific                 |
|                                             | 58      | Severe            | 39  | M   | Family member              | Variant-specific                 |
|                                             | 59      | No/mild phenotype | 42  | M   | Family member              | Variant-specific                 |
| <b>MYBPC3 c.2827C&gt;T p.(Arg943*)</b>      |         |                   |     |     |                            |                                  |
| F043                                        | 60      | Severe            | 27  | M   | Index patient              | NGS panel                        |
| F044                                        | 61      | Severe            | 29  | F   | Index patient              | NGS panel                        |
| F045                                        | 62      | No/mild phenotype | 79  | M   | Index patient              | Sanger sequencing (MYBPC3, MYH7) |
|                                             | 63      | No/mild phenotype | 70  | F   | Family member              | Variant-specific                 |
| <b>MYBPC3 c.2864_2865delCT p.(Pro955fs)</b> |         |                   |     |     |                            |                                  |
| F046                                        | 64      | Severe            | 73  | F   | Index patient              | NGS panel                        |
|                                             | 65      | Severe            | 73  | F   | Family member              | Variant-specific                 |
| F047                                        | 66      | Severe            | 27  | M   | Index patient              | NGS panel                        |
| F048                                        | 67      | Severe            | 61  | F   | Family member              | Variant-specific                 |
| F049                                        | 68      | Genotype-negative | 40  | F   | Family member              | Variant-specific                 |
| F050                                        | 69      | No/mild phenotype | 66  | F   | Index patient              | NGS panel                        |
| <b>MYBPC3 c.3776delA p.(Gln1259fs)</b>      |         |                   |     |     |                            |                                  |

| Family | Subject | Group  | Age | Sex | Reason for genetic testing | Type of genetic testing |
|--------|---------|--------|-----|-----|----------------------------|-------------------------|
| F051   | 70      | Severe | 38  | F   | Family member              | Variant-specific        |

Data shown as counts (%). F, female; M, male; NGS, Next-Generation Sequencing.

**Table S2. Peaks included in biomarker identification models**

| Overall rank | Metabolite name(s)                                                                                | sPLS-DA weight | sPLS-DA rank | XGBoost gain | XGBoost rank | Lasso coefficient | Lasso rank |
|--------------|---------------------------------------------------------------------------------------------------|----------------|--------------|--------------|--------------|-------------------|------------|
| 1            | [Threoninyl-Tryptophan, Tryptophyl-Threonine]                                                     | 3.43E-01       | 2            | 3.72E-02     | 4            | -5.59E-01         | 2          |
| 2            | [2-Methoxy-estradiol-17b 3-glucuronide, 4-hydroxyandrostenedione glucuronide]                     | 3.44E-01       | 1            | 6.27E-02     | 1            | -2.22E-01         | 6          |
| 3            | Menadiol disuccinate                                                                              | -2.24E-01      | 8            |              |              | 7.12E-01          | 1          |
| 4            | Aminoadipic acid                                                                                  | -2.32E-01      | 6            | 3.58E-02     | 5            | 2.88E-01          | 5          |
| 5            | [Aspartyl-(iso)leucine, L-beta-aspartyl-L-leucine, (gamma-)glutamylvaline, (iso)leucyl-aspartate] | -2.71E-01      | 3            | 4.58E-03     | 60           | 2.97E-01          | 4          |
| 6            | [Norophthalmic acid, N2-gamma-Glutamylglutamine]                                                  | 2.51E-01       | 4            | 1.66E-02     | 15           | -1.27E-01         | 9          |
| 7            | [1,3-Dimethyluracil, Imidazolepropionic acid, (pi-)Methylimidazoleacetic acid]                    | -2.09E-01      | 9            | 2.68E-02     | 7            |                   |            |
| 8            | [cis-Zeatin O-glucoside, cis-Zeatin-7/9-N-glucoside]                                              | 1.66E-01       | 12           |              |              | -3.12E-01         | 3          |
| 9            | 3-Fumarylpyruvate                                                                                 | 1.85E-01       | 10           |              |              | -2.13E-01         | 7          |
| 10           | 9,12-Hexadecadienoylcarnitine                                                                     |                |              | 4.44E-02     | 2            |                   |            |
| 11           | 2-Octenoylcarnitine                                                                               | -1.47E-01      | 17           |              |              | 1.94E-01          | 8          |
| 12           | Ceramide(t18:0/16:0)                                                                              | 2.40E-01       | 5            |              |              | -8.67E-07         | 11         |
| 13           | [(Iso)nicotinic acid, picolinic acid]                                                             | -1.26E-01      | 19           | 1.87E-02     | 12           |                   |            |
| 14           | 4-Trimethylammoniobutanal                                                                         | -2.25E-01      | 7            |              |              | 1.82E-06          | 10         |
| 15           | [(S)-3,4-/2,4-Dihydroxybutyric acid, 4-deoxythreonic/-erythronic acid, erythrose, L-erythrulose]  | -1.62E-01      | 13           | 1.11E-02     | 28           |                   |            |
| 16           | 3-Oxoalanine                                                                                      | -8.68E-03      | 45           | 3.84E-02     | 3            |                   |            |
| 17           | Uric acid                                                                                         | -1.16E-01      | 22           | 1.58E-02     | 17           |                   |            |
| 18           | [Hydroxypropyl-Histidine, Histidylhydroxyproline]                                                 | -1.18E-01      | 21           | 1.30E-02     | 22           |                   |            |

| Overall rank | Metabolite name(s)                                                                                                                                                      | sPLS-DA weight | sPLS-DA rank | XGBoost gain | XGBoost rank | Lasso coefficient | Lasso rank |
|--------------|-------------------------------------------------------------------------------------------------------------------------------------------------------------------------|----------------|--------------|--------------|--------------|-------------------|------------|
| 19           | [Dextrin, D-Gal alpha 1->6D-Gal alpha 1->6D-glucose, 3-galactosyllactose, 1-kestose, maltotriose, melezitose]                                                           | -1.71E-01      | 11           | 2.11E-03     | 97           |                   |            |
| 20           | 3,4-Dihydroxybenzylamine                                                                                                                                                |                |              | 2.93E-02     | 6            |                   |            |
| 21           | Hydantoin-5-propionic acid                                                                                                                                              | -1.49E-01      | 16           | 1.77E-03     | 103          |                   |            |
| 22           | Vanilloylglycine                                                                                                                                                        | 1.56E-01       | 14           |              |              |                   |            |
| 23           | 6-Carboxy-5,6,7,8-tetrahydropterin                                                                                                                                      | -1.53E-01      | 15           |              |              |                   |            |
| 24           | Methylguanidine                                                                                                                                                         | -1.40E-01      | 18           |              |              |                   |            |
| 25           | [all-trans-Hexaprenyl/Presqualene diphosphate]                                                                                                                          | -1.05E-01      | 25           | 6.05E-03     | 46           |                   |            |
| 26           | Mesobilirubinogen                                                                                                                                                       |                |              | 2.21E-02     | 8            |                   |            |
| 27           | Protoporphyrin IX                                                                                                                                                       | 8.02E-02       | 28           | 7.17E-03     | 38           |                   |            |
| 28           | [Deoxyhypusine, Spermic acid 1]                                                                                                                                         | -1.18E-01      | 20           |              |              |                   |            |
| 29           | Arachidyl carnitine                                                                                                                                                     |                |              | 2.07E-02     | 9            |                   |            |
| 30           | Ethyl 3-furoate                                                                                                                                                         | -8.58E-02      | 27           | 5.05E-03     | 52           |                   |            |
| 31           | [Serinyl-Threonine, Threonylserine]                                                                                                                                     |                |              | 2.06E-02     | 10           |                   |            |
| 32           | 2-(3-Carboxy-3-(methylammonio)propyl)-L-histidine                                                                                                                       | -1.12E-01      | 23           |              |              |                   |            |
| 33           | 3-Methylhistidine                                                                                                                                                       | -1.10E-01      | 24           |              |              |                   |            |
| 34           | [5,6-/ 8,9-/11,12-/14,15-Dihydroxyeicosatrienoic acid, 6,7-dihydro-12-epi-/10,11-dihydro-/12-keto-tetrahydro-leukotriene B4, 15-hydroperoxyeicosa-8Z,11Z,13E-trienoate] |                |              | 1.98E-02     | 11           |                   |            |
| 35           | [Tryptophyl-Tyrosine, Tyrosyl-Tryptophan]                                                                                                                               |                |              | 1.85E-02     | 13           |                   |            |
| 36           | Guanidinosuccinic acid                                                                                                                                                  | -4.57E-02      | 33           | 9.24E-03     | 33           |                   |            |
| 37           | [Tetracosahexaenoic acid(, n-3)]                                                                                                                                        |                |              | 1.69E-02     | 14           |                   |            |
| 38           | 6,7-Dimethyl-8-(1-D-ribityl)lumazine                                                                                                                                    | -8.89E-02      | 26           |              |              |                   |            |
| 39           | Serinyl-Serine                                                                                                                                                          | -5.95E-02      | 31           | 5.01E-03     | 54           |                   |            |

| Overall rank | Metabolite name(s)                                                                                                   | sPLS-DA weight | sPLS-DA rank | XGBoost gain | XGBoost rank | Lasso coefficient | Lasso rank |
|--------------|----------------------------------------------------------------------------------------------------------------------|----------------|--------------|--------------|--------------|-------------------|------------|
| 40           | [Cholestane-3b,5a,6b-triol, 5b-cholestane-3a,7a,12a-triol/-3a,7a,26-triol/-3a,7a,27-triol]                           |                |              | 1.59E-02     | 16           |                   |            |
| 41           | [Hexanoylglycine, isovalerylalanine/-sarcosine, N-acetylleucine]                                                     |                |              | 1.56E-02     | 18           |                   |            |
| 42           | [D-/L-Lactic acid, hydroxypropionic acid, glyceraldehyde, dihydroxyacetone, methoxyacetic acid]                      |                |              | 1.45E-02     | 19           |                   |            |
| 43           | [D-/L-Aspartic acid, Iminodiacetic acid]                                                                             |                |              | 1.41E-02     | 20           |                   |            |
| 44           | D-Glucuronic acid 1-phosphate                                                                                        | -6.70E-02      | 29           | 1.39E-03     | 113          |                   |            |
| 45           | [(3-)Oxoglutaric acid]                                                                                               |                |              | 1.35E-02     | 21           |                   |            |
| 46           | 5-Methylthioribose                                                                                                   | -6.64E-02      | 30           | 1.07E-03     | 133          |                   |            |
| 47           | 1-Phenyl-5-propyl-1H-pyrazole                                                                                        |                |              | 1.25E-02     | 23           |                   |            |
| 48           | [3-Methoxy-4-hydroxyphenyl(ethylene)glycol sulfate]                                                                  |                |              | 1.22E-02     | 24           |                   |            |
| 49           | Betaine aldehyde                                                                                                     |                |              | 1.21E-02     | 25           |                   |            |
| 50           | Neuraminic acid                                                                                                      | -5.44E-02      | 32           | 2.06E-03     | 99           |                   |            |
| 51           | [(1R)-Glutathionyl-(2R)-hydroxy-1,2-dihydronaphthalene, (1R/1S)-Hydroxy-(2R/2S)-glutathionyl-1,2-dihydronaphthalene] |                |              | 1.16E-02     | 26           |                   |            |
| 52           | 3-Hydroxyanthranilic acid                                                                                            |                |              | 1.12E-02     | 27           |                   |            |
| 53           | albendazole S-oxide                                                                                                  |                |              | 1.10E-02     | 29           |                   |            |
| 54           | [24-Hydroxycalcitriol, 3beta,7alpha-Dihydroxy-5-cholestenoate, 23S,25,26-Trihydroxyvitamin D3]                       | -3.42E-02      | 38           | 4.24E-03     | 64           |                   |            |
| 55           | Lysosphingomyelin(d18:1)                                                                                             | -3.76E-02      | 36           | 3.47E-03     | 77           |                   |            |
| 56           | Stearidonyl carnitine                                                                                                | -2.80E-03      | 48           | 9.73E-03     | 30           |                   |            |
| 57           | [Glutamyl(-Iso)leucine, (Iso)leucyl-Glutamate]                                                                       |                |              | 9.65E-03     | 31           |                   |            |
| 58           | Deoxyuridine-diphosphate                                                                                             |                |              | 9.57E-03     | 32           |                   |            |
| 59           | [MG(0:0/22:0/0:0), MG(22:0/0:0/0:0)]                                                                                 | -1.67E-02      | 43           | 6.08E-03     | 45           |                   |            |

| Overall rank | Metabolite name(s)                                                                                                                              | sPLS-DA weight | sPLS-DA rank | XGBoost gain | XGBoost rank | Lasso coefficient | Lasso rank |
|--------------|-------------------------------------------------------------------------------------------------------------------------------------------------|----------------|--------------|--------------|--------------|-------------------|------------|
| 60           | Histidylproline diketopiperazine                                                                                                                |                |              | 8.88E-03     | 34           |                   |            |
| 61           | [Asparaginy-Cysteine, Cysteinyl-Asparagine]                                                                                                     |                |              | 8.44E-03     | 35           |                   |            |
| 62           | Indanone                                                                                                                                        | -2.66E-02      | 40           | 3.48E-03     | 76           |                   |            |
| 63           | [MG(0:0/20:2(11Z,14Z)/0:0),<br>MG(20:2(11Z,14Z)/0:0/0:0)]                                                                                       | -4.41E-02      | 34           |              |              |                   |            |
| 64           | [D-/L-/DL-Glutamic acid, N-Methyl-D-aspartic acid, N-Acetylserine, L-4-Hydroxyglutamate semialdehyde]                                           | -7.22E-03      | 46           | 6.63E-03     | 41           |                   |            |
| 65           | Cis-stilbene oxide                                                                                                                              | -4.22E-02      | 35           |              |              |                   |            |
| 66           | [Sinapyl alcohol, 3,4-Dihydroxyphenylvaleric acid]                                                                                              |                |              | 7.61E-03     | 36           |                   |            |
| 67           | E,e-Carotene-3,3'-dione                                                                                                                         |                |              | 7.57E-03     | 37           |                   |            |
| 68           | [cis-2-Methylnaconitate, (Z)-But-1-ene-1,2,4-tricarboxylate]                                                                                    |                |              | 7.06E-03     | 39           |                   |            |
| 69           | [Homoanserine, Histidylvaline, Valylhistidine]                                                                                                  |                |              | 6.79E-03     | 40           |                   |            |
| 70           | 1-Lyso-2-arachidonoyl-phosphatidate                                                                                                             | 3.65E-02       | 37           |              |              |                   |            |
| 71           | 3-Hydroxyquinine                                                                                                                                |                |              | 6.60E-03     | 42           |                   |            |
| 72           | 24,25,26,27-Tetranor-23-oxo-hydroxyvitamin D3                                                                                                   |                |              | 6.41E-03     | 43           |                   |            |
| 73           | Psychosine sulfate                                                                                                                              |                |              | 6.14E-03     | 44           |                   |            |
| 74           | [N-Acetyl-6-O-L-fucosyl-D-glucosamine, 2-Acetamido-2-deoxy-6-O-a-L-fucopyranosyl-D-glucose, 3-O-fucopyranosyl-2-acetamido-2-deoxyglucopyranose] |                |              | 5.94E-03     | 47           |                   |            |
| 75           | [Alanyl-Methionine, Cysteinyl-Valine, Methionyl-Alanine, Valylcysteine]                                                                         |                |              | 5.94E-03     | 48           |                   |            |
| 76           | [Indoleacetic acid, 5-Hydroxyindoleacetaldehyde]                                                                                                | -3.15E-02      | 39           |              |              |                   |            |
| 77           | Pyrocatechol sulfate                                                                                                                            |                |              | 5.74E-03     | 49           |                   |            |
| 78           | Quercetin 3'-O-glucuronide                                                                                                                      |                |              | 5.66E-03     | 50           |                   |            |



| Overall rank | Metabolite name(s)                                                                                                                                          | sPLS-DA weight | sPLS-DA rank | XGBoost gain | XGBoost rank | Lasso coefficient | Lasso rank |
|--------------|-------------------------------------------------------------------------------------------------------------------------------------------------------------|----------------|--------------|--------------|--------------|-------------------|------------|
| 79           | Indole-5,6-quinone                                                                                                                                          | -1.94E-02      | 42           | 2.02E-03     | 100          |                   |            |
| 80           | [Glutaminy-Tyrosine, Tyrosyl-Glutamine, Tyrosyl-Gamma-glutamate, gamma-Glutamyltyrosine]                                                                    |                |              | 5.15E-03     | 51           |                   |            |
| 81           | [(alpha-/beta-)D-Glucose, D-/L-Galactose, D-Mannose, myo-/scyllo-Inositol, 3-Deoxyarabinohexonic acid, D-Fructose, Allose, L-Sorbose, D-Tagatose, L-Gulose] |                |              | 5.02E-03     | 53           |                   |            |
| 82           | [(D-)4-Hydroxy-2-oxoglutaric acid]                                                                                                                          |                |              | 4.96E-03     | 55           |                   |            |
| 83           | Pyrrole-2-carboxylic acid                                                                                                                                   |                |              | 4.89E-03     | 56           |                   |            |
| 84           | Glycine                                                                                                                                                     |                |              | 4.88E-03     | 57           |                   |            |
| 85           | 2-Hydroxypyridine                                                                                                                                           |                |              | 4.78E-03     | 58           |                   |            |
| 86           | [N-Acetyl-D-Glucosamine 6-Phosphate, N-Acetyl-D-mannosamine 6-phosphate, N-Acetyl-glucosamine 1-/6-phosphate, N-Acetyl-(alpha-)D-galactosamine 1-phosphate] |                |              | 4.69E-03     | 59           |                   |            |
| 87           | Isoxanthopterin                                                                                                                                             |                |              | 4.52E-03     | 61           |                   |            |
| 88           | Deoxycytidine-triphosphate                                                                                                                                  |                |              | 4.47E-03     | 62           |                   |            |
| 89           | [Asparaginy-Tyrosine, Tyrosyl-Asparagine, Tyrosylglycylglycine]                                                                                             | -2.45E-02      | 41           |              |              |                   |            |
| 90           | 2H3-Glutamate (internal standard)                                                                                                                           |                |              | 4.36E-03     | 63           |                   |            |
| 91           | 4-Oxo-2-nonenal                                                                                                                                             |                |              | 4.19E-03     | 65           |                   |            |
| 92           | Arsenate                                                                                                                                                    |                |              | 4.08E-03     | 66           |                   |            |
| 93           | Putrescine                                                                                                                                                  |                |              | 4.07E-03     | 67           |                   |            |
| 94           | N-[(4E,8E)-1,3-dihydroxyoctadeca-4,8-dien-2-yl]hexadecanamide                                                                                               |                |              | 4.07E-03     | 68           |                   |            |
| 95           | [L-/DL-Dopa, N-Hydroxy-L-tyrosine]                                                                                                                          |                |              | 4.03E-03     | 69           |                   |            |
| 96           | Flavone                                                                                                                                                     |                |              | 3.93E-03     | 70           |                   |            |
| 97           | 2-Phenylethanol glucuronide                                                                                                                                 |                |              | 3.88E-03     | 71           |                   |            |

| Overall rank | Metabolite name(s)                                                                                                     | sPLS-DA weight | sPLS-DA rank | XGBoost gain | XGBoost rank | Lasso coefficient | Lasso rank |
|--------------|------------------------------------------------------------------------------------------------------------------------|----------------|--------------|--------------|--------------|-------------------|------------|
| 98           | [2-Chloro-5-methylmaleylacetate, 3-Chloro-2-methylmaleylacetate]                                                       | -1.45E-02      | 44           | 1.07E-03     | 134          |                   |            |
| 99           | Indolepyruvate                                                                                                         |                |              | 3.69E-03     | 72           |                   |            |
| 100          | [4-Hydroxybenzoic acid, Gentisate aldehyde]                                                                            |                |              | 3.68E-03     | 73           |                   |            |
| 101          | Topaquinone                                                                                                            |                |              | 3.66E-03     | 74           |                   |            |
| 102          | Adenylylselenate                                                                                                       |                |              | 3.57E-03     | 75           |                   |            |
| 103          | [MG(0:0/15:0/0:0), MG(15:0/0:0/0:0)]                                                                                   |                |              | 3.46E-03     | 78           |                   |            |
| 104          | Hydroxypropyl-Hydroxyproline                                                                                           |                |              | 3.41E-03     | 79           |                   |            |
| 105          | S-Nitrosoglutathione                                                                                                   |                |              | 3.31E-03     | 80           |                   |            |
| 106          | Indoxyl sulfate                                                                                                        | -4.89E-03      | 47           | 2.40E-03     | 90           |                   |            |
| 107          | 2-Hydroxyundecanoate                                                                                                   |                |              | 3.26E-03     | 81           |                   |            |
| 108          | 3-Hydroxydodecanedioic acid                                                                                            |                |              | 3.17E-03     | 82           |                   |            |
| 109          | L-Glutamic acid 5-phosphate                                                                                            |                |              | 3.12E-03     | 83           |                   |            |
| 110          | 2'-Deoxyinosine triphosphate                                                                                           |                |              | 3.09E-03     | 84           |                   |            |
| 111          | Neuromedin N (1-4)                                                                                                     |                |              | 2.97E-03     | 85           |                   |            |
| 112          | [2-Phenylglycine, Dopamine quinone, Leukoaminochrome]                                                                  |                |              | 2.54E-03     | 86           |                   |            |
| 113          | Bisnorbiotin                                                                                                           |                |              | 2.54E-03     | 87           |                   |            |
| 114          | [7b-Hydroxy-3-oxo-5b-cholanoic acid, MG(0:0/22:6(4Z,7Z,10Z,13Z,16Z,19Z)/0:0), MG(22:6(4Z,7Z,10Z,13Z,16Z,19Z)/0:0/0:0)] |                |              | 2.54E-03     | 88           |                   |            |
| 115          | 8-Oxoguanine                                                                                                           |                |              | 2.42E-03     | 89           |                   |            |
| 116          | [Lysyl-Threonine, Threonyllysine]                                                                                      |                |              | 2.38E-03     | 91           |                   |            |
| 117          | Galactosylglycerol                                                                                                     |                |              | 2.32E-03     | 92           |                   |            |
| 118          | [DG(14:0/14:0/0:0), DG(14:0/0:0/14:0)]                                                                                 |                |              | 2.31E-03     | 93           |                   |            |
| 119          | [Arginyl-(gamma-)Glutamine, (gamma-)Glutamylarginine]                                                                  |                |              | 2.26E-03     | 94           |                   |            |
| 120          | [Glucosamine 6-sulfate, N-Sulfo-D-glucosamine]                                                                         |                |              | 2.23E-03     | 95           |                   |            |

| Overall rank | Metabolite name(s)                                                                                            | sPLS-DA weight | sPLS-DA rank | XGBoost gain | XGBoost rank | Lasso coefficient | Lasso rank |
|--------------|---------------------------------------------------------------------------------------------------------------|----------------|--------------|--------------|--------------|-------------------|------------|
| 121          | L-Palmitoylcarnitine                                                                                          |                |              | 2.16E-03     | 96           |                   |            |
| 122          | Ciliatine                                                                                                     |                |              | 2.08E-03     | 98           |                   |            |
| 123          | Pentosidine                                                                                                   |                |              | 1.90E-03     | 101          |                   |            |
| 124          | Xanthurenic acid                                                                                              |                |              | 1.84E-03     | 102          |                   |            |
| 125          | Lysosphingomyelin(d18:0)                                                                                      |                |              | 1.74E-03     | 104          |                   |            |
| 126          | Menadione                                                                                                     |                |              | 1.71E-03     | 105          |                   |            |
| 127          | [(Iso)peonidin-3-glucoside,<br>Isopeonidin 3-galactoside]                                                     |                |              | 1.69E-03     | 106          |                   |            |
| 128          | Dimethylprotoporphyrin IX dimethyl ester                                                                      |                |              | 1.56E-03     | 107          |                   |            |
| 129          | [Uridine diphosphate glucose/galactose]                                                                       |                |              | 1.54E-03     | 108          |                   |            |
| 130          | [Xanthine, 6,8-Dihydroxypurine]                                                                               |                |              | 1.49E-03     | 109          |                   |            |
| 131          | [Lysophosphatidic acid(0:0/18:0),<br>Lysophosphatidic acid(18:0/0:0)]                                         |                |              | 1.47E-03     | 110          |                   |            |
| 132          | Diethylthiophosphate                                                                                          |                |              | 1.41E-03     | 111          |                   |            |
| 133          | [S-(Hydroxymethyl)glutathione,<br>gamma-Glutamylcysteinylserine]                                              |                |              | 1.40E-03     | 112          |                   |            |
| 134          | [Guanosine triphosphate,<br>8-Oxo-Deoxyguanosine triphosphate]                                                |                |              | 1.36E-03     | 114          |                   |            |
| 135          | Dihydroneopterin triphosphate                                                                                 |                |              | 1.35E-03     | 115          |                   |            |
| 136          | Sedoheptulose 1,7-bisphosphate                                                                                |                |              | 1.34E-03     | 116          |                   |            |
| 137          | [4-Hydroxyphenylpyruvic acid,<br>2-Hydroxy-3-(4-hydroxyphenyl)propenoic acid,<br>3-Hydroxyphenylpyruvic acid] |                |              | 1.32E-03     | 117          |                   |            |
| 138          | [Alanyl-Tyrosine, Phenylalanylserine,<br>Serylphenylalanine, Tyrosyl-Alanine]                                 |                |              | 1.30E-03     | 118          |                   |            |
| 139          | 4-Hydroperoxy-2-nonenal                                                                                       |                |              | 1.29E-03     | 119          |                   |            |

| Overall rank | Metabolite name(s)                                                                                                                                                                                                                                                                                                                                  | sPLS-DA weight | sPLS-DA rank | XGBoost gain | XGBoost rank | Lasso coefficient | Lasso rank |
|--------------|-----------------------------------------------------------------------------------------------------------------------------------------------------------------------------------------------------------------------------------------------------------------------------------------------------------------------------------------------------|----------------|--------------|--------------|--------------|-------------------|------------|
| 140          | [Cholesteryl acetate, 4alpha-Formyl-4beta-methyl-5alpha-cholesta-8-en-3beta-ol, 4alpha-Hydroxymethyl-4beta-methyl-5alpha-cholesta-8,24-dien-3beta-ol, 3-beta-Hydroxy-4-beta-methyl-5-alpha-cholest-7-ene-4-alpha-carbaldehyde]                                                                                                                      |                |              | 1.26E-03     | 120          |                   |            |
| 141          | [2-O-a-L-Fucopyranosyl-galactose, 3-O-a-L-Fucopyranosyl-D-glucose]                                                                                                                                                                                                                                                                                  |                |              | 1.26E-03     | 121          |                   |            |
| 142          | 15N_2-13C-Glycine (internal standard)                                                                                                                                                                                                                                                                                                               |                |              | 1.25E-03     | 122          |                   |            |
| 143          | Glycylprolylhydroxyproline                                                                                                                                                                                                                                                                                                                          |                |              | 1.25E-03     | 123          |                   |            |
| 144          | [Chenodeoxycholic acid disulfate, Deoxycholic acid disulfate]                                                                                                                                                                                                                                                                                       |                |              | 1.25E-03     | 124          |                   |            |
| 145          | gamma-Glutamyl-beta-aminopropionitrile                                                                                                                                                                                                                                                                                                              |                |              | 1.22E-03     | 125          |                   |            |
| 146          | [DG(14:0/20:1(11Z)/0:0), DG(14:1(9Z)/20:0/0:0), DG(16:0/18:1(11Z)/0:0), DG(16:0/18:1(9Z)/0:0), DG(16:1(9Z)/18:0/0:0), DG(18:0/16:1(9Z)/0:0), DG(18:1(11Z)/16:0/0:0), DG(18:1(9Z)/16:0/0:0), DG(20:0/14:1(9Z)/0:0), DG(20:1(11Z)/14:0/0:0), DG(14:0/0:0/20:1n9), DG(16:0/0:0/18:1n7), DG(16:0/0:0/18:1n9), DG(18:0/0:0/16:1n7), DG(20:0/0:0/14:1n5)] |                |              | 1.21E-03     | 126          |                   |            |
| 147          | Deoxycytidine monophosphate                                                                                                                                                                                                                                                                                                                         |                |              | 1.20E-03     | 127          |                   |            |
| 148          | S-(2-Methylpropionyl)-dihydrolipoamide-E                                                                                                                                                                                                                                                                                                            |                |              | 1.14E-03     | 128          |                   |            |
| 149          | Ceramide phosphate(d18:1/12:0)                                                                                                                                                                                                                                                                                                                      |                |              | 1.13E-03     | 129          |                   |            |
| 150          | L-Cysteinylglycine disulfide                                                                                                                                                                                                                                                                                                                        |                |              | 1.13E-03     | 130          |                   |            |
| 151          | L-Cystine                                                                                                                                                                                                                                                                                                                                           |                |              | 1.11E-03     | 131          |                   |            |
| 152          | [(Iso)leucyl-(Iso)leucine]                                                                                                                                                                                                                                                                                                                          |                |              | 1.07E-03     | 132          |                   |            |
| 153          | [5-Methylthiorib(ul)ose 1-phosphate]                                                                                                                                                                                                                                                                                                                |                |              | 1.06E-03     | 135          |                   |            |

| Overall rank | Metabolite name(s)                                                                                                                                                                                                                                                                                                                                                                                                                 | sPLS-DA weight | sPLS-DA rank | XGBoost gain | XGBoost rank | Lasso coefficient | Lasso rank |
|--------------|------------------------------------------------------------------------------------------------------------------------------------------------------------------------------------------------------------------------------------------------------------------------------------------------------------------------------------------------------------------------------------------------------------------------------------|----------------|--------------|--------------|--------------|-------------------|------------|
| 154          | Guanethidine                                                                                                                                                                                                                                                                                                                                                                                                                       |                |              | 1.00E-03     | 136          |                   |            |
| 155          | [2-(3-Carboxy-3-aminopropyl)-L-histidine, Histidylthreonine, Threonylhistidine]                                                                                                                                                                                                                                                                                                                                                    |                |              | 9.83E-04     | 137          |                   |            |
| 156          | S-(1,2-Dichlorovinyl)glutathione                                                                                                                                                                                                                                                                                                                                                                                                   |                |              | 9.83E-04     | 138          |                   |            |
| 157          | [Gamma-glutamyl-L-putrescine, Alanyllysine, Lysylalanine, beta-Alanyl-L-lysine]                                                                                                                                                                                                                                                                                                                                                    |                |              | 9.70E-04     | 139          |                   |            |
| 158          | Quercetin 3'-sulfate                                                                                                                                                                                                                                                                                                                                                                                                               |                |              | 9.61E-04     | 140          |                   |            |
| 159          | [D-/L-Glutamine, Ureidoisobutyric acid, Alanylglycine]                                                                                                                                                                                                                                                                                                                                                                             |                |              | 9.48E-04     | 141          |                   |            |
| 160          | [Glycyl-Lysine, Lysylglycine]                                                                                                                                                                                                                                                                                                                                                                                                      |                |              | 9.40E-04     | 142          |                   |            |
| 161          | Sumiki's acid                                                                                                                                                                                                                                                                                                                                                                                                                      |                |              | 9.37E-04     | 143          |                   |            |
| 162          | [3b,12a-Dihydroxy-5a-cholanoic acid, 3b,7a-Dihydroxy-5b-cholanoic acid, 3a,7a-Dihydroxycholanoic acid, 3a,12b-Dihydroxy-5b-cholanoic acid, 3b,12a-Dihydroxy-5b-cholanoic acid, (Allo/iso)deoxycholic acid, (Allo)chenodeoxycholic acid, (Iso)hyodeoxycholic acid, (Iso)ursodeoxycholic acid, Murocholic acid, 7b,12a-Dihydroxycholanoic acid, 7a,12b-dihydroxy-5b-Cholan-24-oic acid, 3beta,12beta-Dihydroxy-5beta-cholanoic acid] |                |              | 9.37E-04     | 144          |                   |            |
| 163          | O-Phospho-4-hydroxy-L-threonine                                                                                                                                                                                                                                                                                                                                                                                                    |                |              | 9.19E-04     | 145          |                   |            |
| 164          | Temurin                                                                                                                                                                                                                                                                                                                                                                                                                            |                |              | 9.12E-04     | 146          |                   |            |
| 165          | Selenocysteine                                                                                                                                                                                                                                                                                                                                                                                                                     | -2.29E-03      | 49           |              |              |                   |            |
| 166          | Saccharopine                                                                                                                                                                                                                                                                                                                                                                                                                       | -1.07E-03      | 50           |              |              |                   |            |

Full list of the peaks included in each of the biomarker identification models (Sparse partial least squares discriminant analysis, XGBoost and Lasso logistic regression). Coefficients and ranks are provided for each separate model, Peaks have been ordered by their overall relative importance. Names of metabolites annotated to the same peak are listed within square brackets. sPLS-DA, Sparse partial least squares discriminant analysis; MG, Monoacylglycerol; DG, diacylglycerol.

**Table S3. Sensitivity analyses: Lasso logistic regression results**

|                                                                                                                      | Excluding heart<br>failure<br>Odds ratio | Excluding prior septal<br>reduction therapy<br>Odds ratio |
|----------------------------------------------------------------------------------------------------------------------|------------------------------------------|-----------------------------------------------------------|
| [Threoninyl-Tryptophan, Tryptophyl-Threonine]                                                                        | 0.260                                    | 0.302                                                     |
| [2-Methoxy-estradiol-17b 3-glucuronide,<br>4-hydroxyandrostenedione glucuronide]                                     | Not selected                             | 0.791                                                     |
| Menadiol disuccinate                                                                                                 | 1.572                                    | 1.091                                                     |
| Aminoadipic acid                                                                                                     | 1.000                                    | Not selected                                              |
| [Aspartyl-(iso)leucine, L-beta-aspartyl-L-leucine,<br>(gamma-)glutamylvaline, (iso)leucyl-aspartate]                 | 4.101                                    | Not selected                                              |
| [Norophthalmic acid,<br>N2-gamma-Glutamylglutamine]                                                                  | 0.205                                    | 0.488                                                     |
| [1,3-Dimethyluracil, imidazolepropionic acid,<br>(Pi-)methylimidazoleacetic acid]                                    | Not selected                             | Not selected                                              |
| [cis-Zeatin O-glucoside,<br>Cis-zeatin-7/9-N-glucoside]                                                              | 0.300                                    | 0.366                                                     |
| 3-Fumarylpyruvate                                                                                                    | 0.740                                    | 0.572                                                     |
| 9,12-Hexadecadienoylcarnitine                                                                                        | 0.936                                    | 0.930                                                     |
| 2-Octenoylcarnitine                                                                                                  | 1.015                                    | Not selected                                              |
| Cer(t18:0/16:0)                                                                                                      | 0.935                                    | 0.648                                                     |
| [(Iso)nicotinic acid, picolinic acid]                                                                                | Not selected                             | Not selected                                              |
| 4-Trimethylammonibutanol                                                                                             | Not selected                             | 1.239                                                     |
| [(S)-3,4-/2,4-Dihydroxybutyric acid,<br>4-deoxythreonic/-erythronic acid,<br>erythrose, L-erythrulose]               | 1.140                                    | Not selected                                              |
| 3-Oxoalanine                                                                                                         | Not selected                             | 1.237                                                     |
| Uric acid                                                                                                            | Not selected                             | 1.060                                                     |
| [Hydroxypropyl-Histidine, Histidylhydroxyproline]                                                                    | 1.198                                    | 1.867                                                     |
| [Dextrin, D-Gal alpha 1->6D-Gal alpha 1->6D-<br>glucose, 3-galactosyllactose, 1-kestose,<br>maltotriose, melezitose] | 1.155                                    | Not selected                                              |
| 3,4-Dihydroxybenzylamine                                                                                             | 2.732                                    | Not selected                                              |
| Hydantoin-5-propionic acid                                                                                           | Not selected                             | Not selected                                              |
| Vanilloylglycine                                                                                                     | Not selected                             | 0.860                                                     |

|                                                                                                                                                                         | Excluding heart<br>failure<br>Odds ratio | Excluding prior septal<br>reduction therapy<br>Odds ratio |
|-------------------------------------------------------------------------------------------------------------------------------------------------------------------------|------------------------------------------|-----------------------------------------------------------|
| 6-Carboxy-5,6,7,8-tetrahydropterin                                                                                                                                      | 1.688                                    | 1.432                                                     |
| Methylguanidine                                                                                                                                                         | Not selected                             | Not selected                                              |
| [all-trans-Hexaprenyl/Presqualene diphosphate]                                                                                                                          | 1.295                                    | 1.719                                                     |
| Mesobilirubinogen                                                                                                                                                       | Not selected                             | Not selected                                              |
| [Deoxyhypusine, Spermic acid 1]                                                                                                                                         | Not selected                             | Not selected                                              |
| Arachidyl carnitine                                                                                                                                                     | 1.400                                    | Not selected                                              |
| [Serinyl-Threonine, Threonylserine]                                                                                                                                     | Not selected                             | Not selected                                              |
| 2-(3-Carboxy-3-(methyllumonio)propyl)-L-histidine                                                                                                                       | Not selected                             | Not selected                                              |
| 3-Methylhistidine                                                                                                                                                       | Not selected                             | Not selected                                              |
| [5,6-/ 8,9-/11,12-/14,15-Dihydroxyeicosatrienoic acid, 6,7-dihydro-12-epi-/10,11-dihydro-/12-keto-tetrahydro-leukotriene B4, 15-hydroperoxyeicosa-8Z,11Z,13E-trienoate] | 5.202                                    | Not selected                                              |
| [Tryptophyl-Tyrosine, Tyrosyl-Tryptophan]                                                                                                                               | 0.735                                    | 0.953                                                     |
| [Tetracosahexaenoic acid(, n-3)]                                                                                                                                        | Not selected                             | Not selected                                              |
| [Cholestane-3b,5a,6b-triol, 5b-cholestane-3a,7a,12a-triol/-3a,7a,26-triol/-3a,7a,27-triol]                                                                              | Not selected                             | Not selected                                              |
| [Hexanoylglycine, isovalerylalanine/-sarcosine, N-acetylleucine]                                                                                                        | Not selected                             | Not selected                                              |
| [D-/L-Lactic acid, hydroxypropionic acid, glyceraldehyde, dihydroxyacetone, methoxyacetic acid]                                                                         | Not selected                             | 1.280                                                     |
| [D-/L-Aspartic acid, Iminodiacetic acid]                                                                                                                                | Not selected                             | Not selected                                              |
| [(3-)Oxoglutaric acid]                                                                                                                                                  | Not selected                             | 1.236                                                     |
| 1-Phenyl-5-propyl-1H-pyrazole                                                                                                                                           | 0.973                                    | 0.901                                                     |
| [3-Methoxy-4-hydroxyphenyl(ethylene)glycol sulfate]                                                                                                                     | Not selected                             | Not selected                                              |
| Betaine aldehyde                                                                                                                                                        | Not selected                             | Not selected                                              |



Results of Lasso logistic regression in both sensitivity analyses. The first excluded subjects with heart failure (congestive heart failure or left ventricular ejection fraction <50%), the second excluded subjects with prior septal reduction therapy. Metabolites are ordered by their overall rank across the metabolite selection models employed on the full cohort, as in Supplemental Table 2.

**Table S4. External validation: Lasso logistic regression results**

|                                                                                                      | Odds ratio   |
|------------------------------------------------------------------------------------------------------|--------------|
| Male sex                                                                                             | 1.396E+06    |
| Age                                                                                                  | 2.511E+04    |
| [Threoninyl-Tryptophan, Tryptophyl-Threonine]                                                        | 4.405        |
| [2-Methoxy-estradiol-17b 3-glucuronide,<br>4-hydroxyandrostenedione glucuronide]                     | 2.062E+02    |
| Menadiol disuccinate                                                                                 | 5.708E+02    |
| Aminoadipic acid                                                                                     | 1.409        |
| [Aspartyl-(iso)leucine, L-beta-aspartyl-L-leucine,<br>(gamma-)glutamylvaline, (iso)leucyl-aspartate] | Not selected |
| [Norophthalmic acid,<br>N2-gamma-Glutamylglutamine]                                                  | Not selected |
| [1,3-Dimethyluracil, imidazolepropionic acid,<br>(Pi-)methylimidazoleacetic acid]                    | 0.028        |
| [cis-Zeatin O-glucoside,<br>Cis-zeatin-7/9-N-glucoside]                                              | Not selected |
| 3-Fumarylpyruvate                                                                                    | 2.416        |
| 9,12-Hexadecadienoylcarnitine                                                                        | 0.070        |

Results of Lasso logistic regression in both sensitivity analyses. The first excluded subjects with heart failure (congestive heart failure or left ventricular ejection fraction <50%), the second excluded subjects with prior septal reduction therapy. Metabolites are ordered by their overall rank across the metabolite selection models employed on the full cohort, as in Supplemental Table 2.

**Figure S1. Distribution of outcomes**

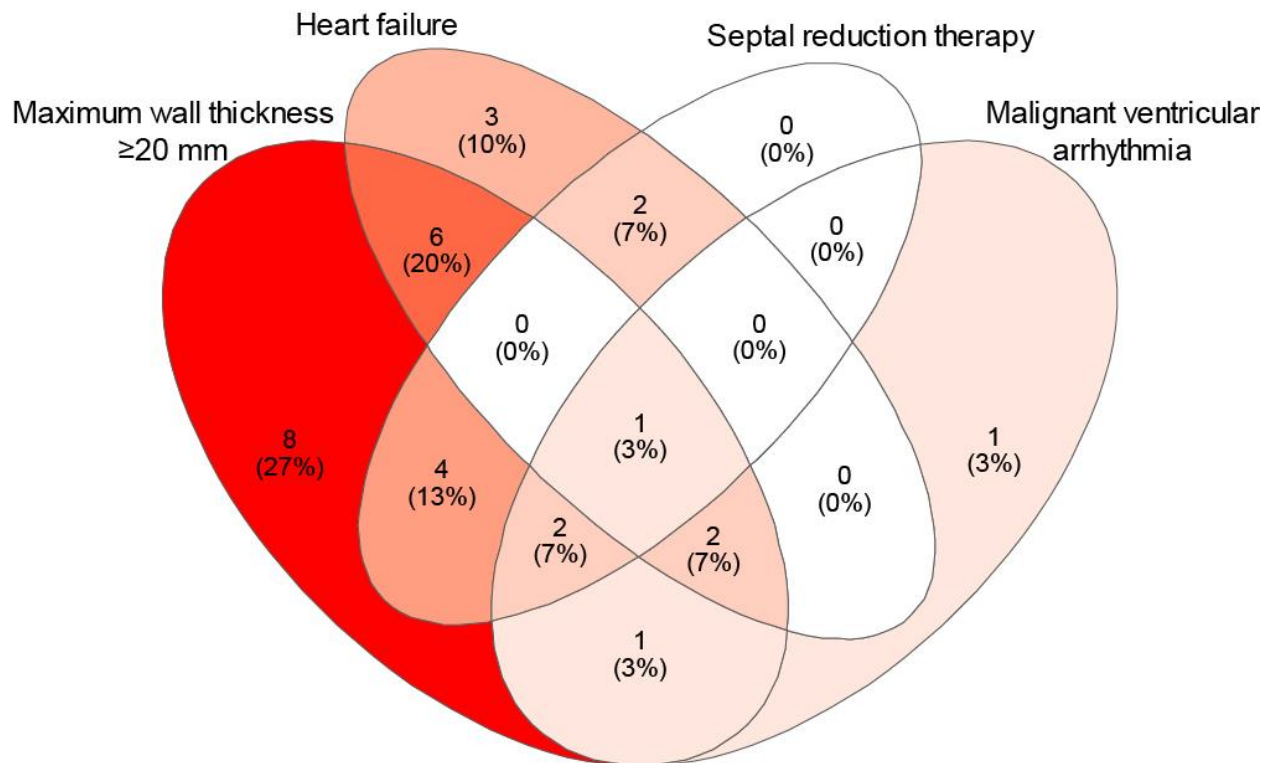

Venn diagram of outcomes fulfilled by the subjects with severe phenotypes, created using the ggVennDiagram package. The numbers in each section represent the number of patients fulfilling each combination of outcomes. Colours are scaled to the number of subjects per section.

**Figure S2. Correlation between peaks**

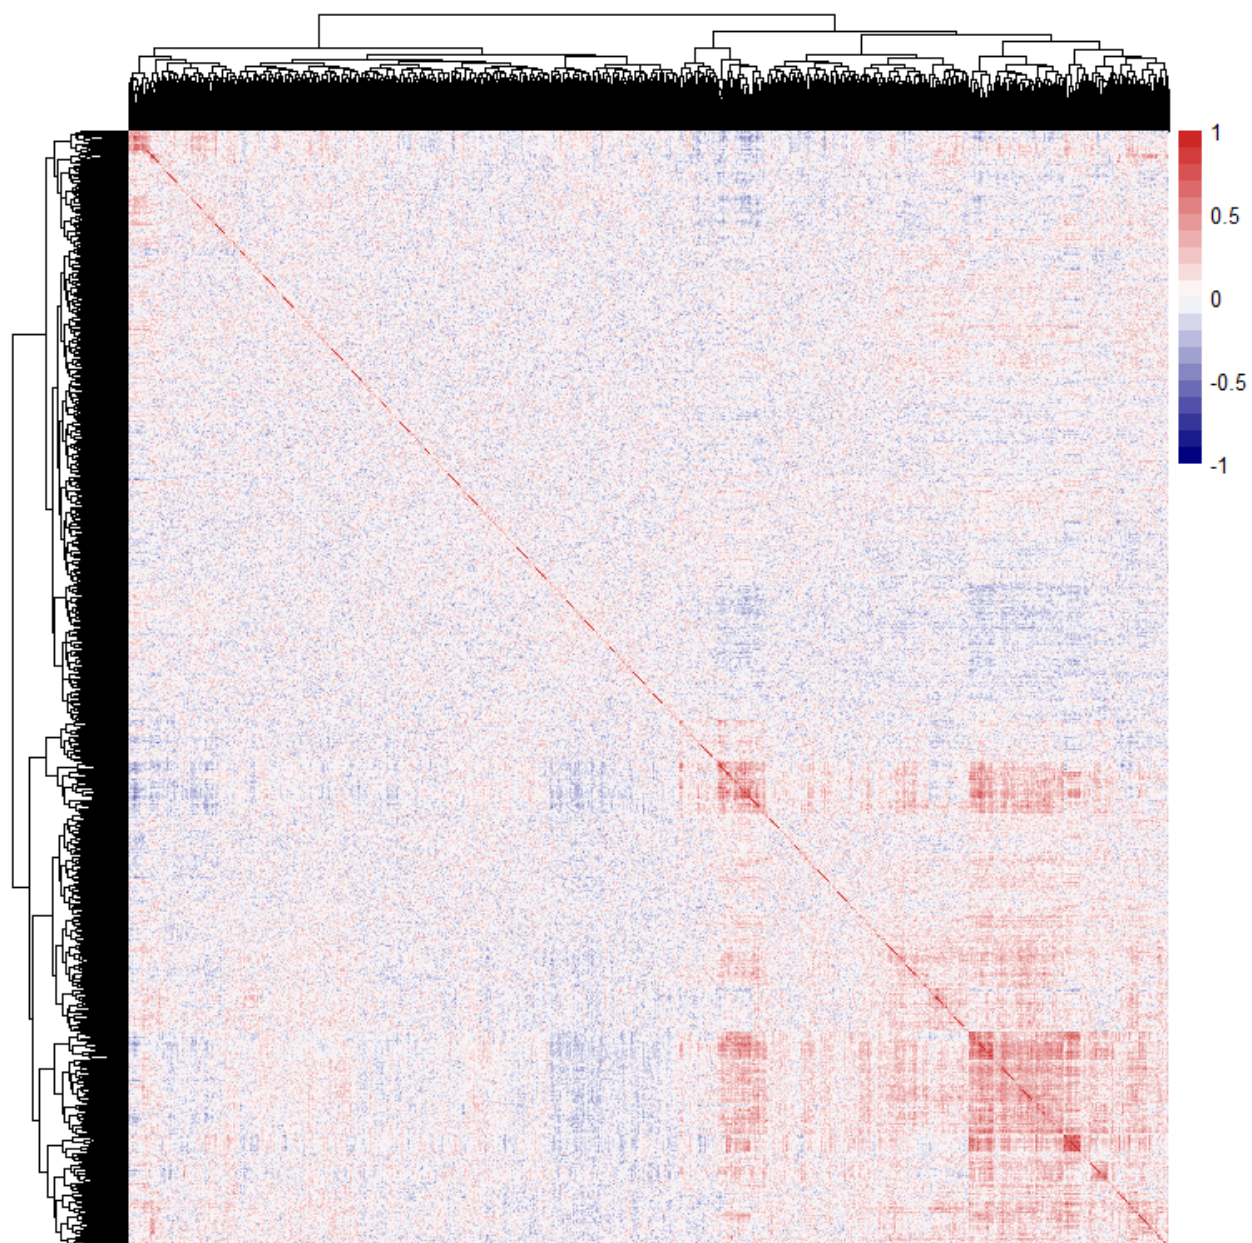

Heatmap of Spearman's correlation coefficients between the 1903 unique metabolite peaks.

**Figure S3. Correlations between the selected peaks**

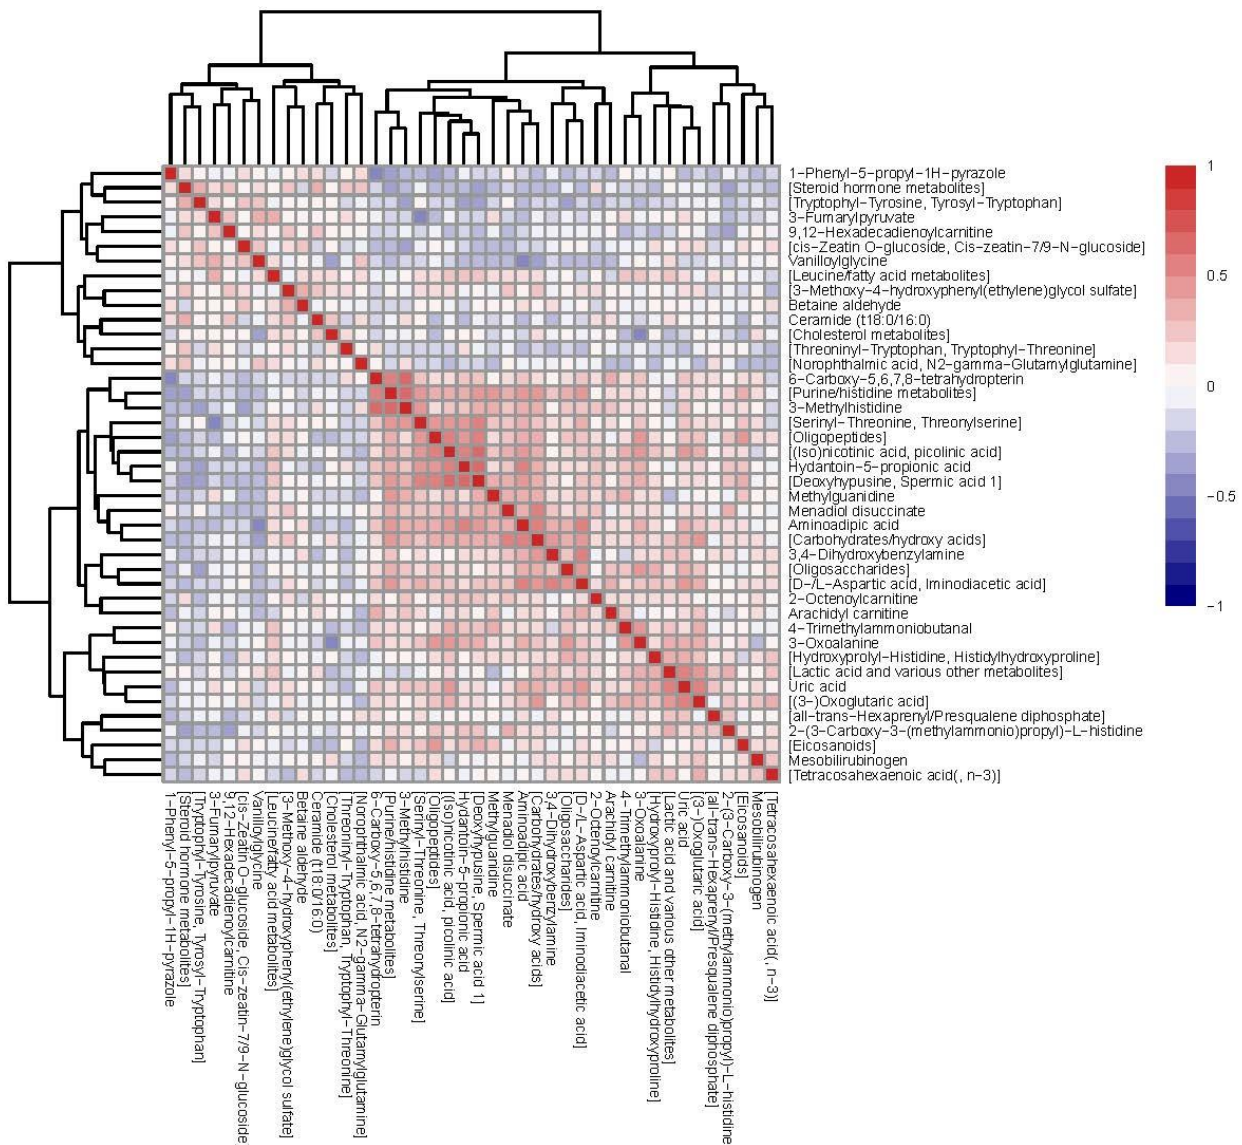

Heatmap of Spearman's  $\rho$  correlations between the 42 top metabolite peaks, consisting of the top 25 peaks identified by each analysis (sparse partial least squares discriminant analysis, XGBoost and Lasso logistic regression).



**Figure S4. Box plots of selected peaks**

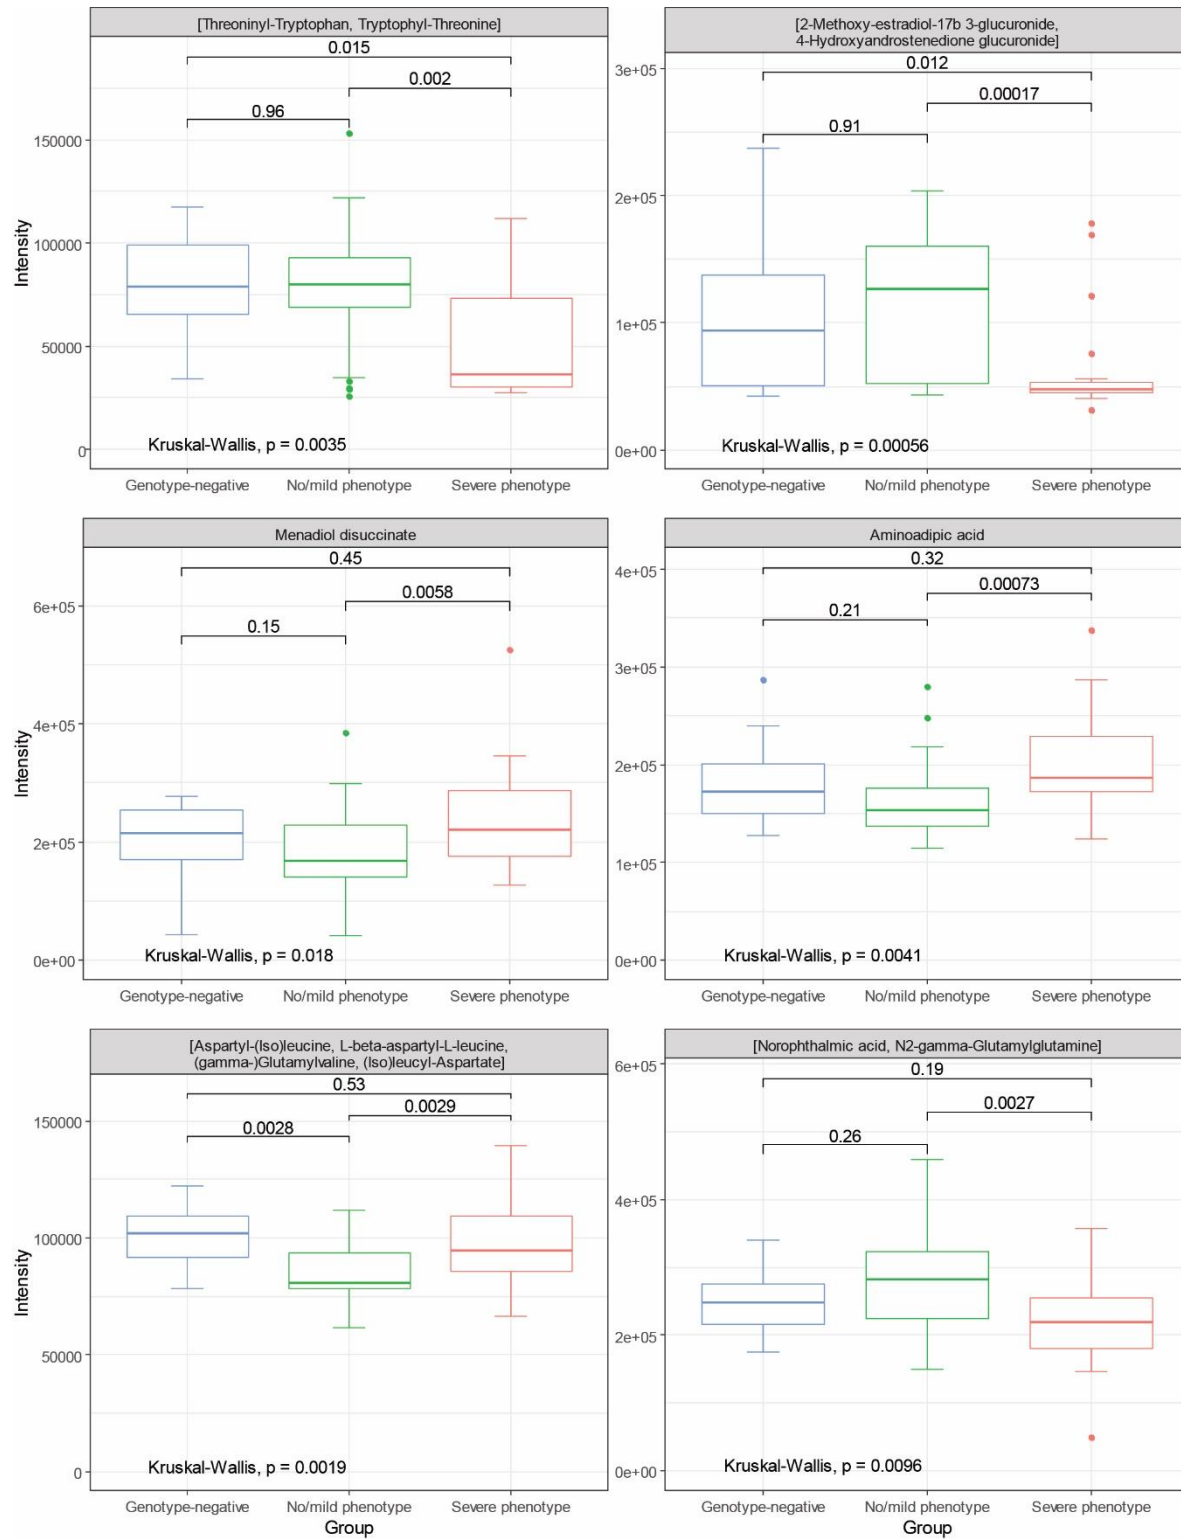

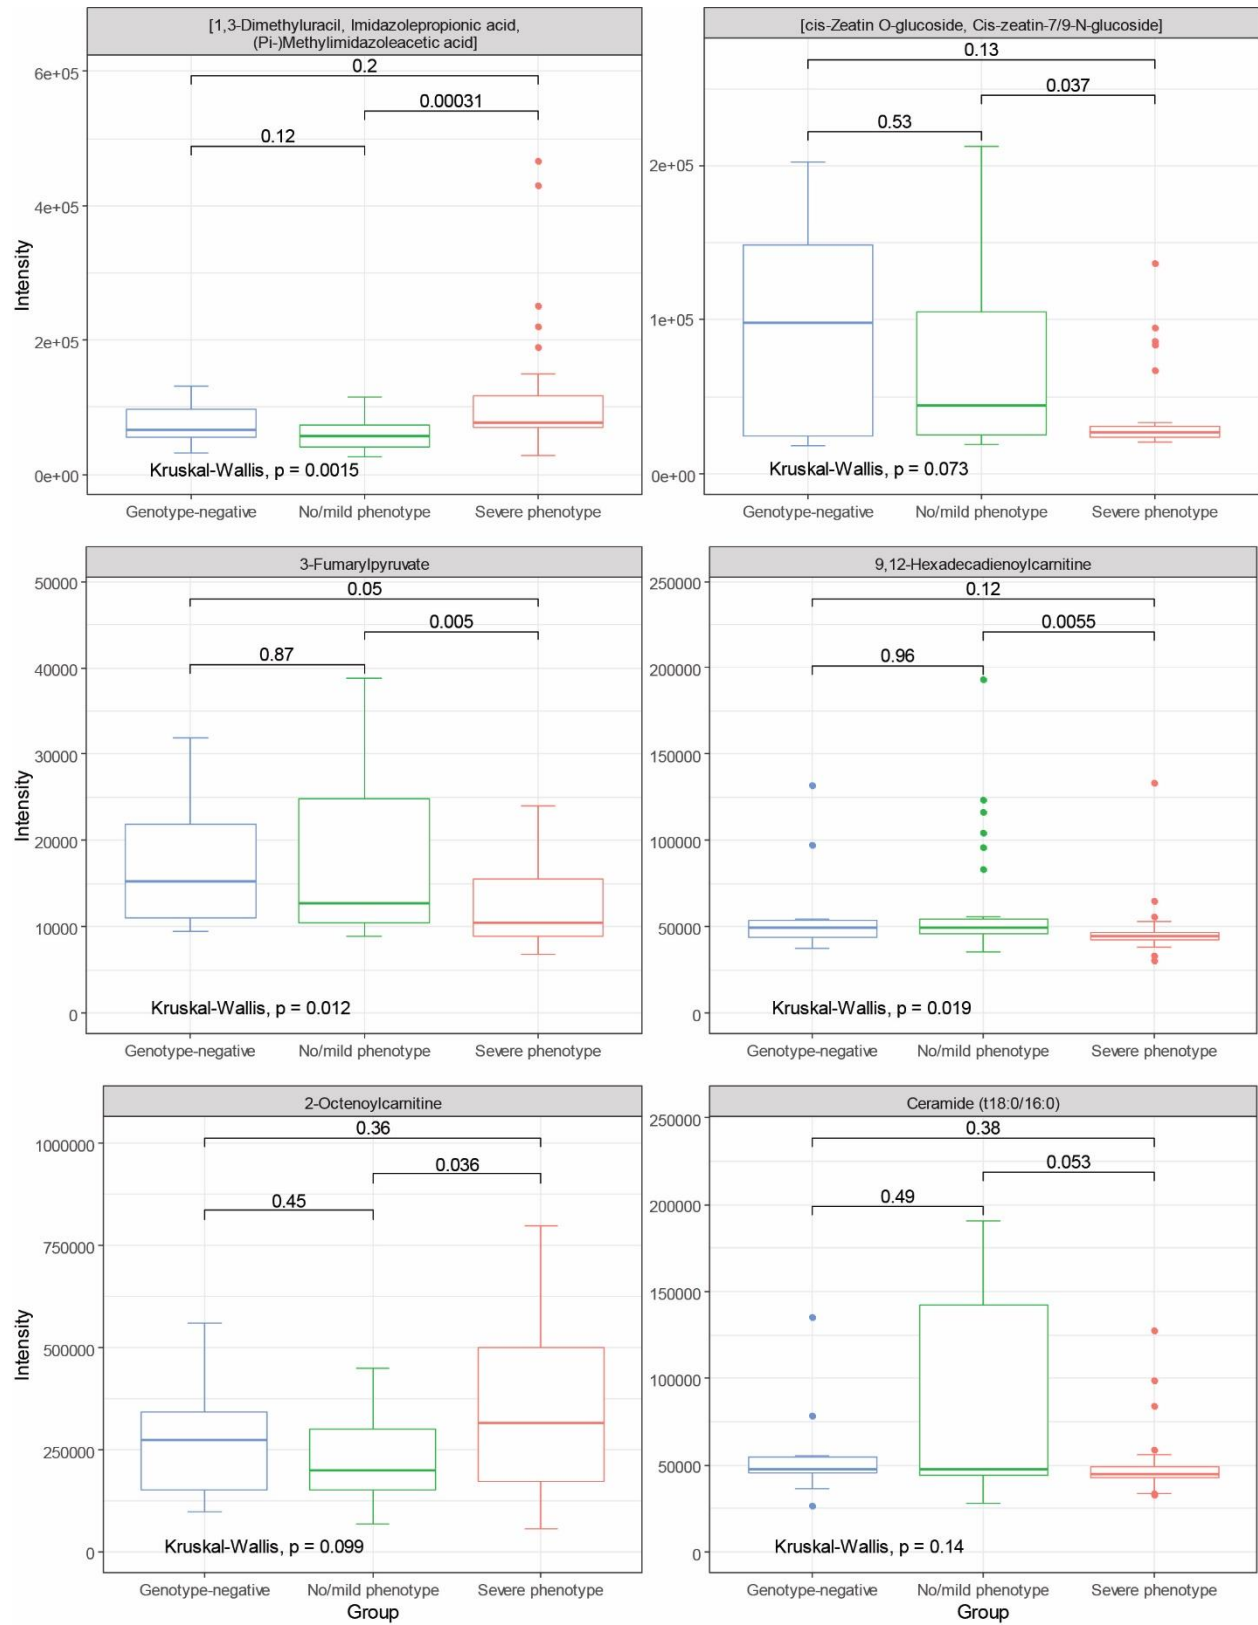

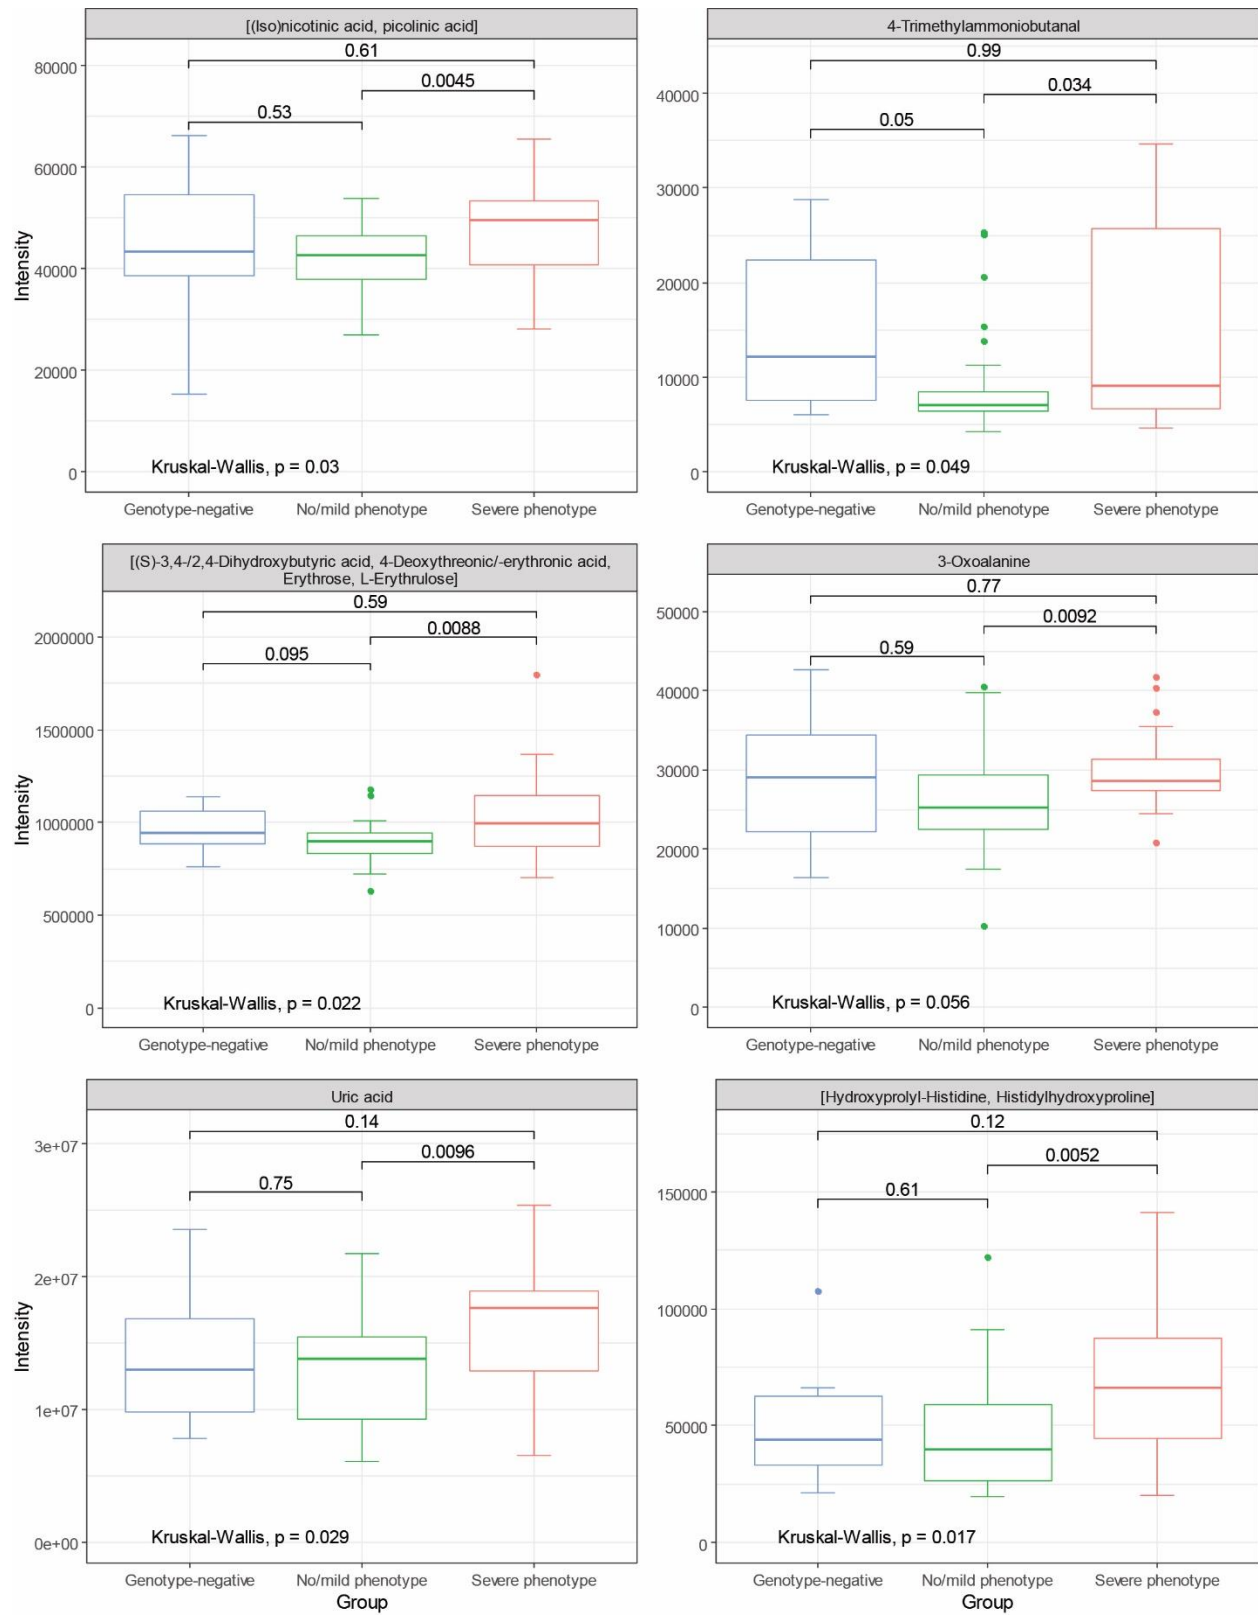



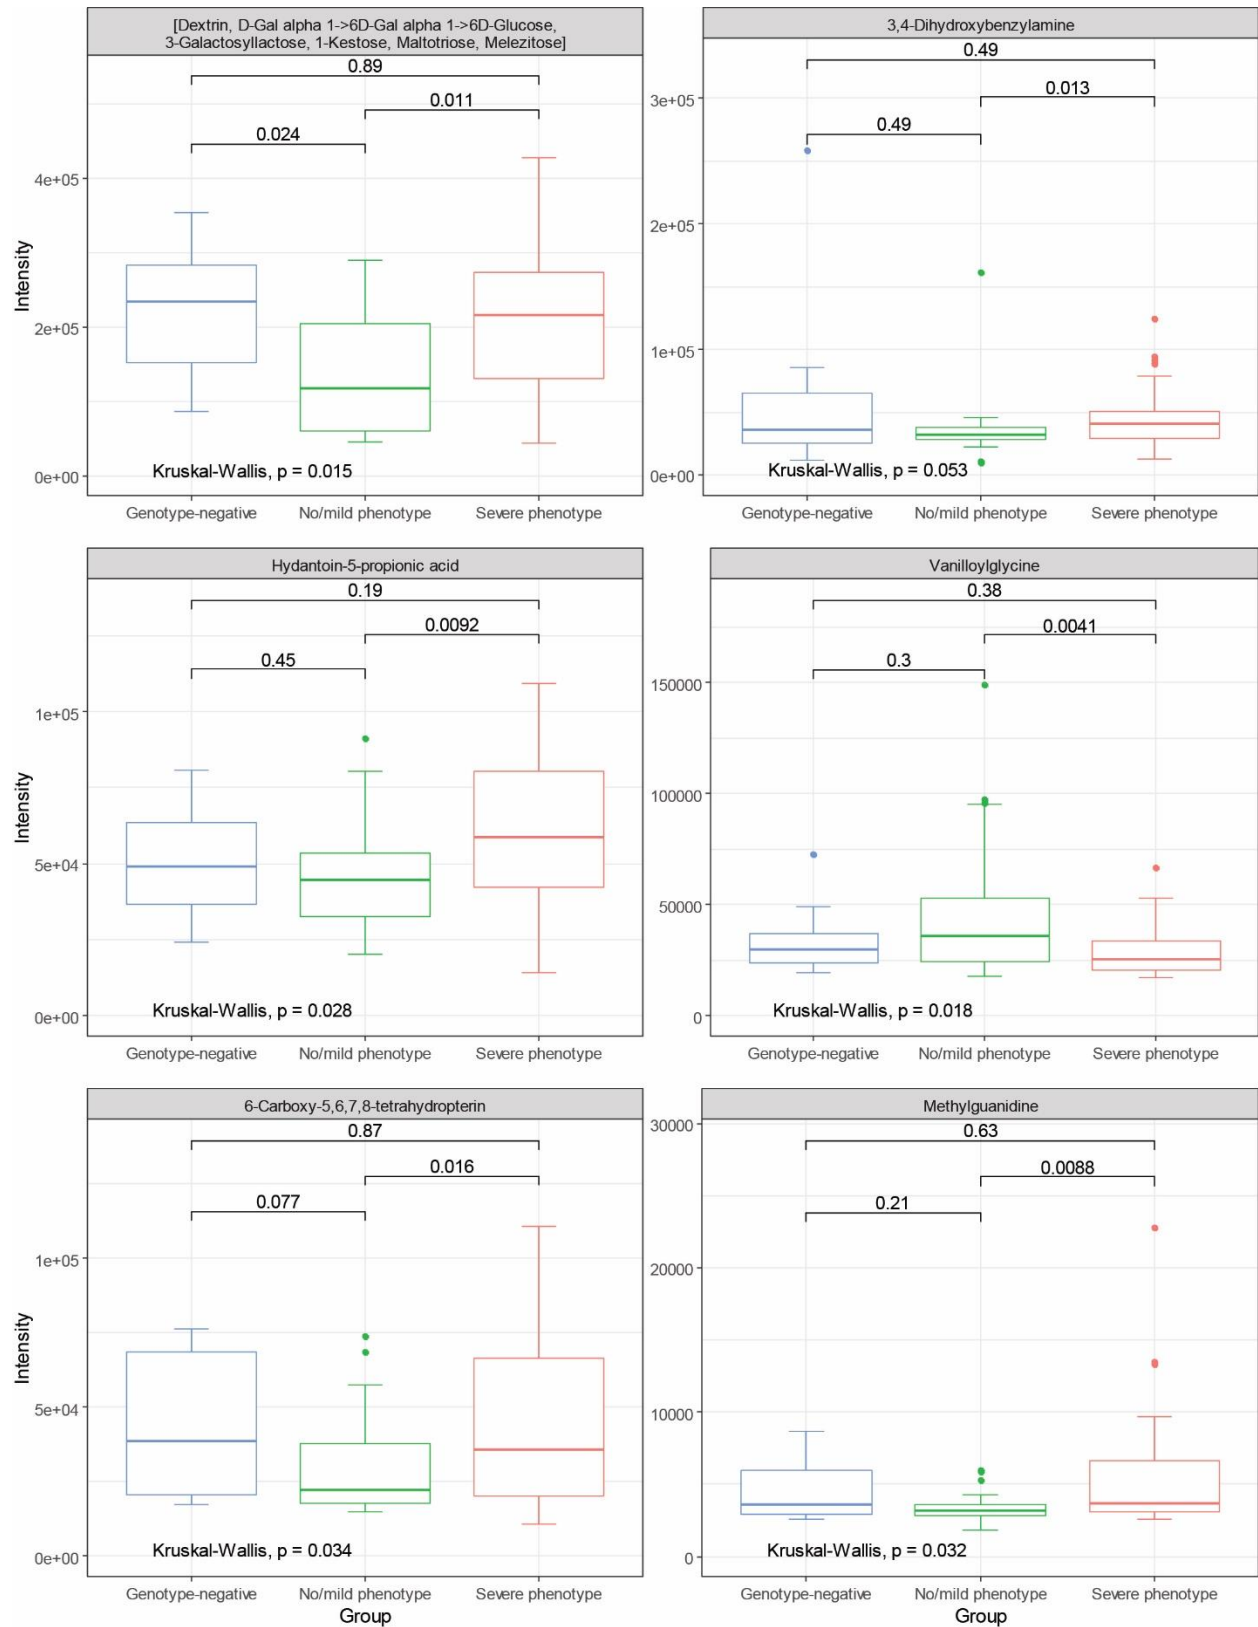

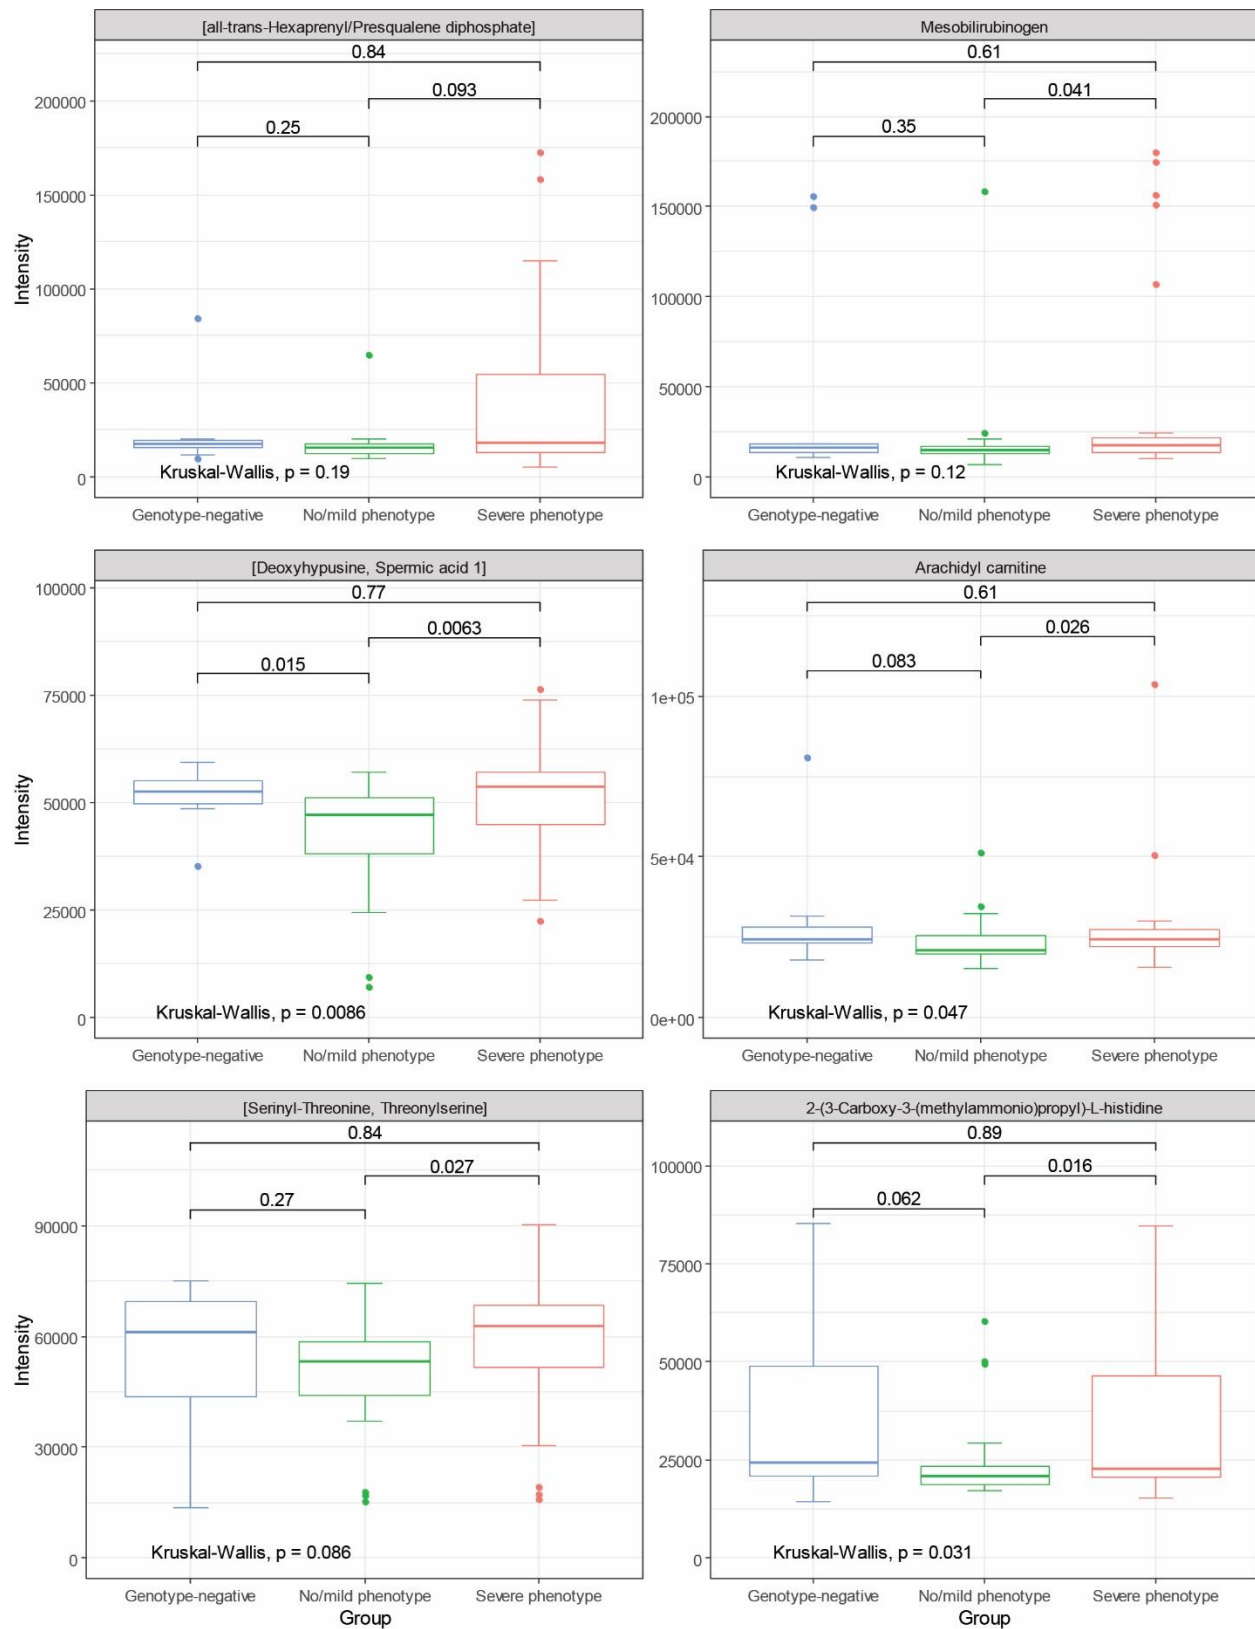

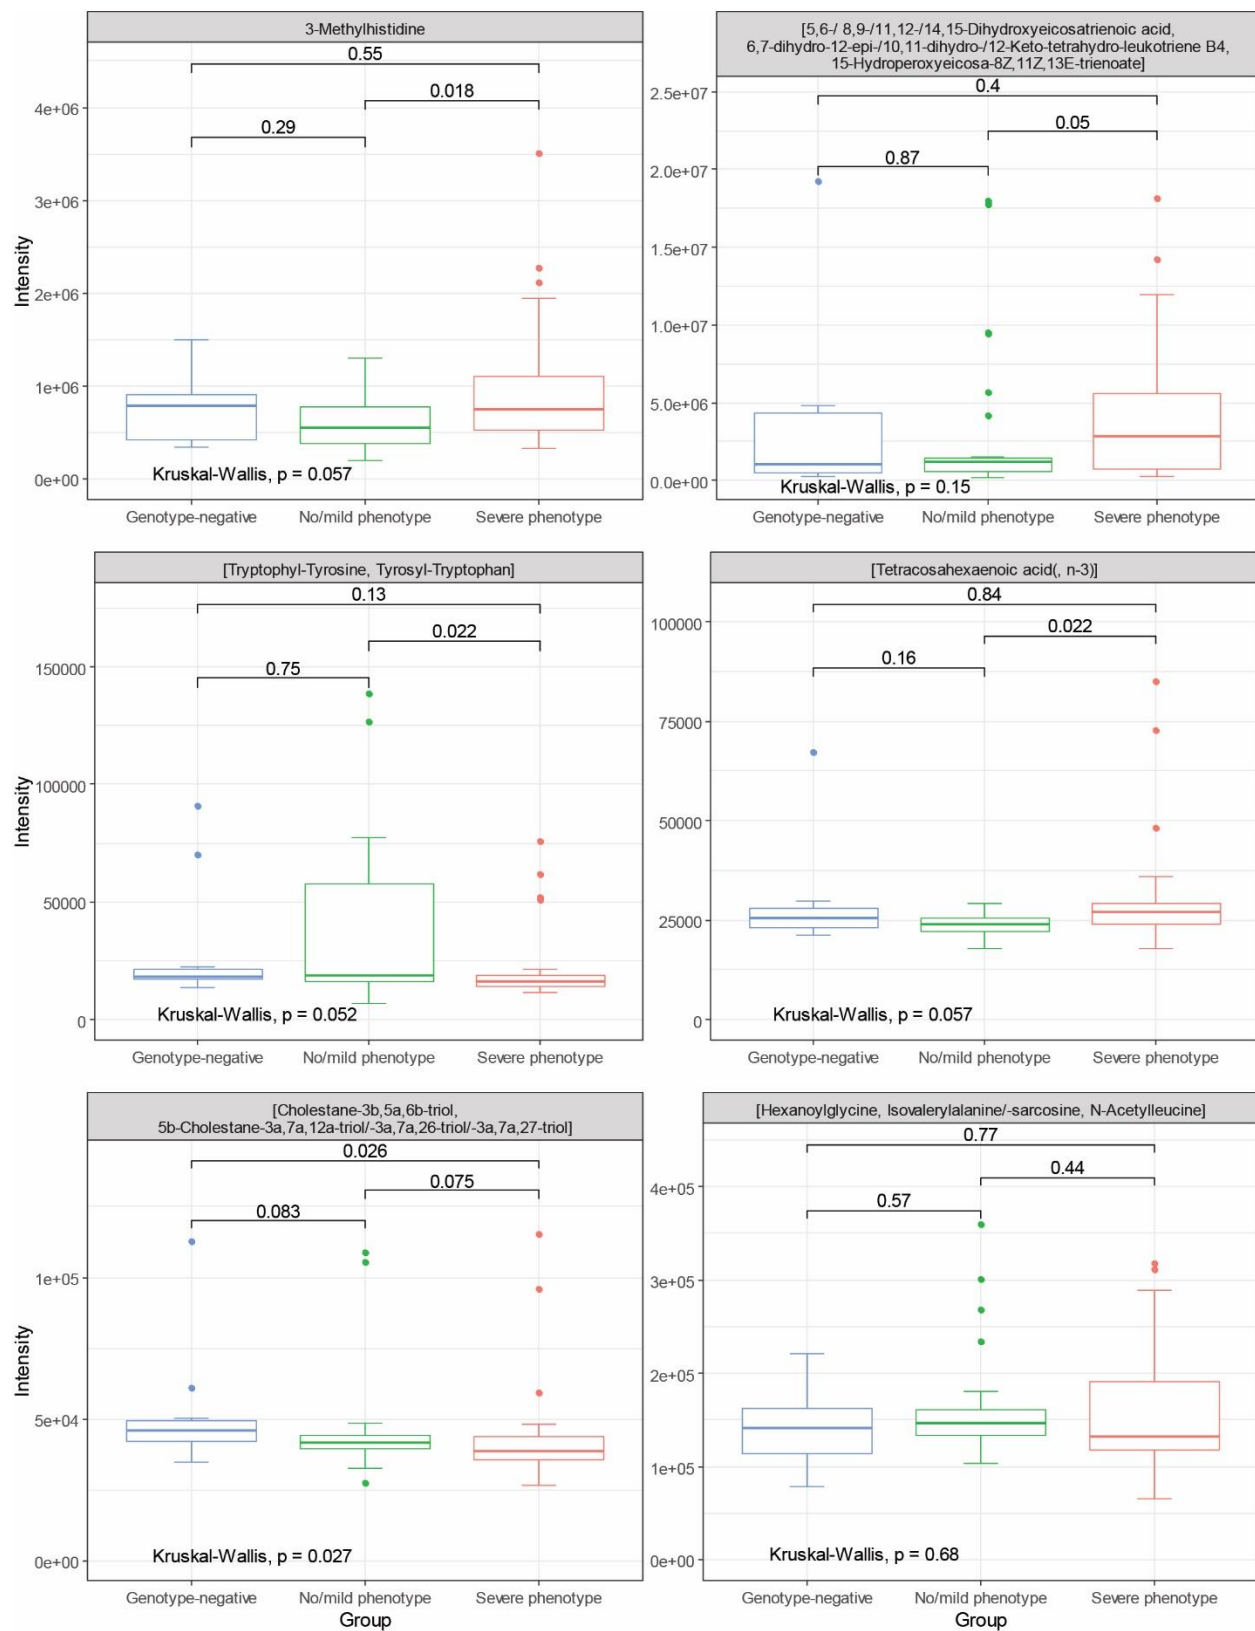

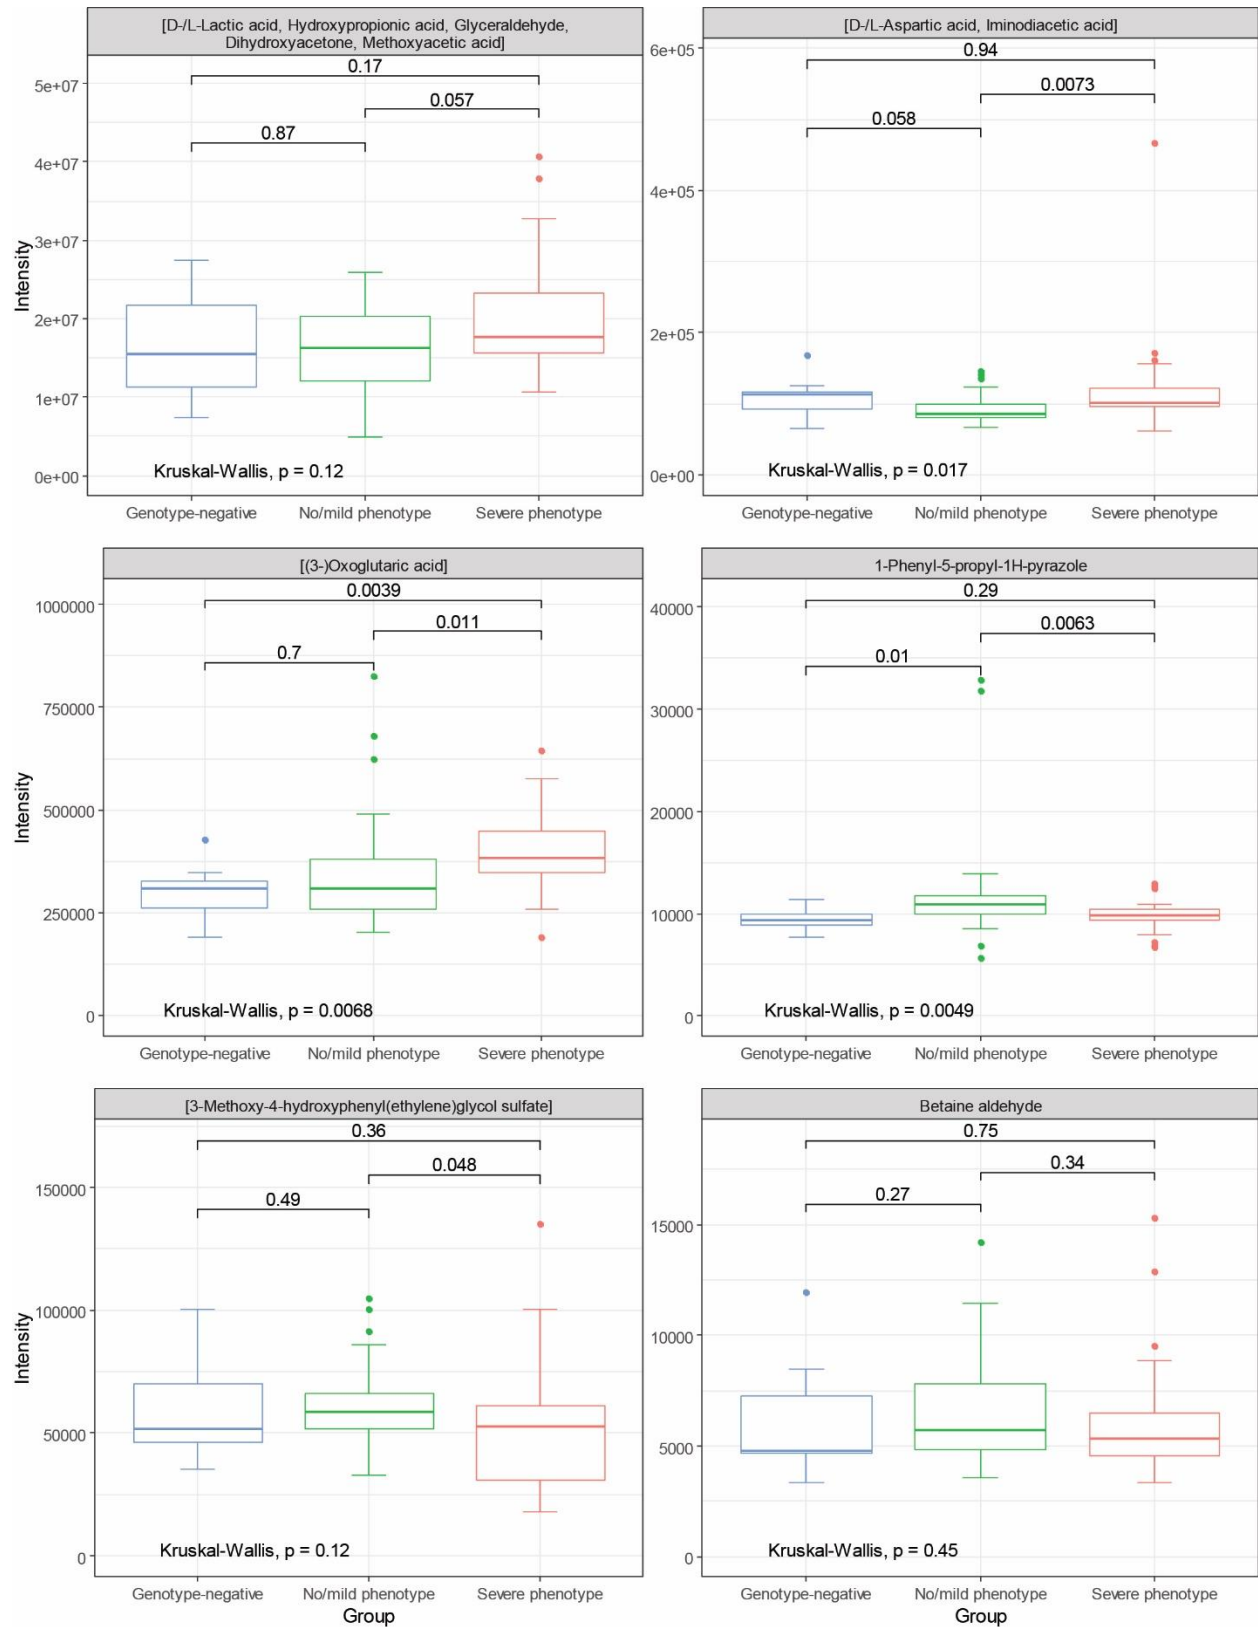

Box plots of the intensities of the 42 top peaks identified by the biomarker identification models (sparse partial least squares discriminant analysis, XGBoost and Lasso logistic regression), stratified per group and ordered by relative importance across the three models. P-values are annotated for between group comparisons using Mann-Whitney U tests and across group comparisons using Kruskal-Wallis test.

Figure S5. Box plots of selected peaks, excluding subjects with heart failure

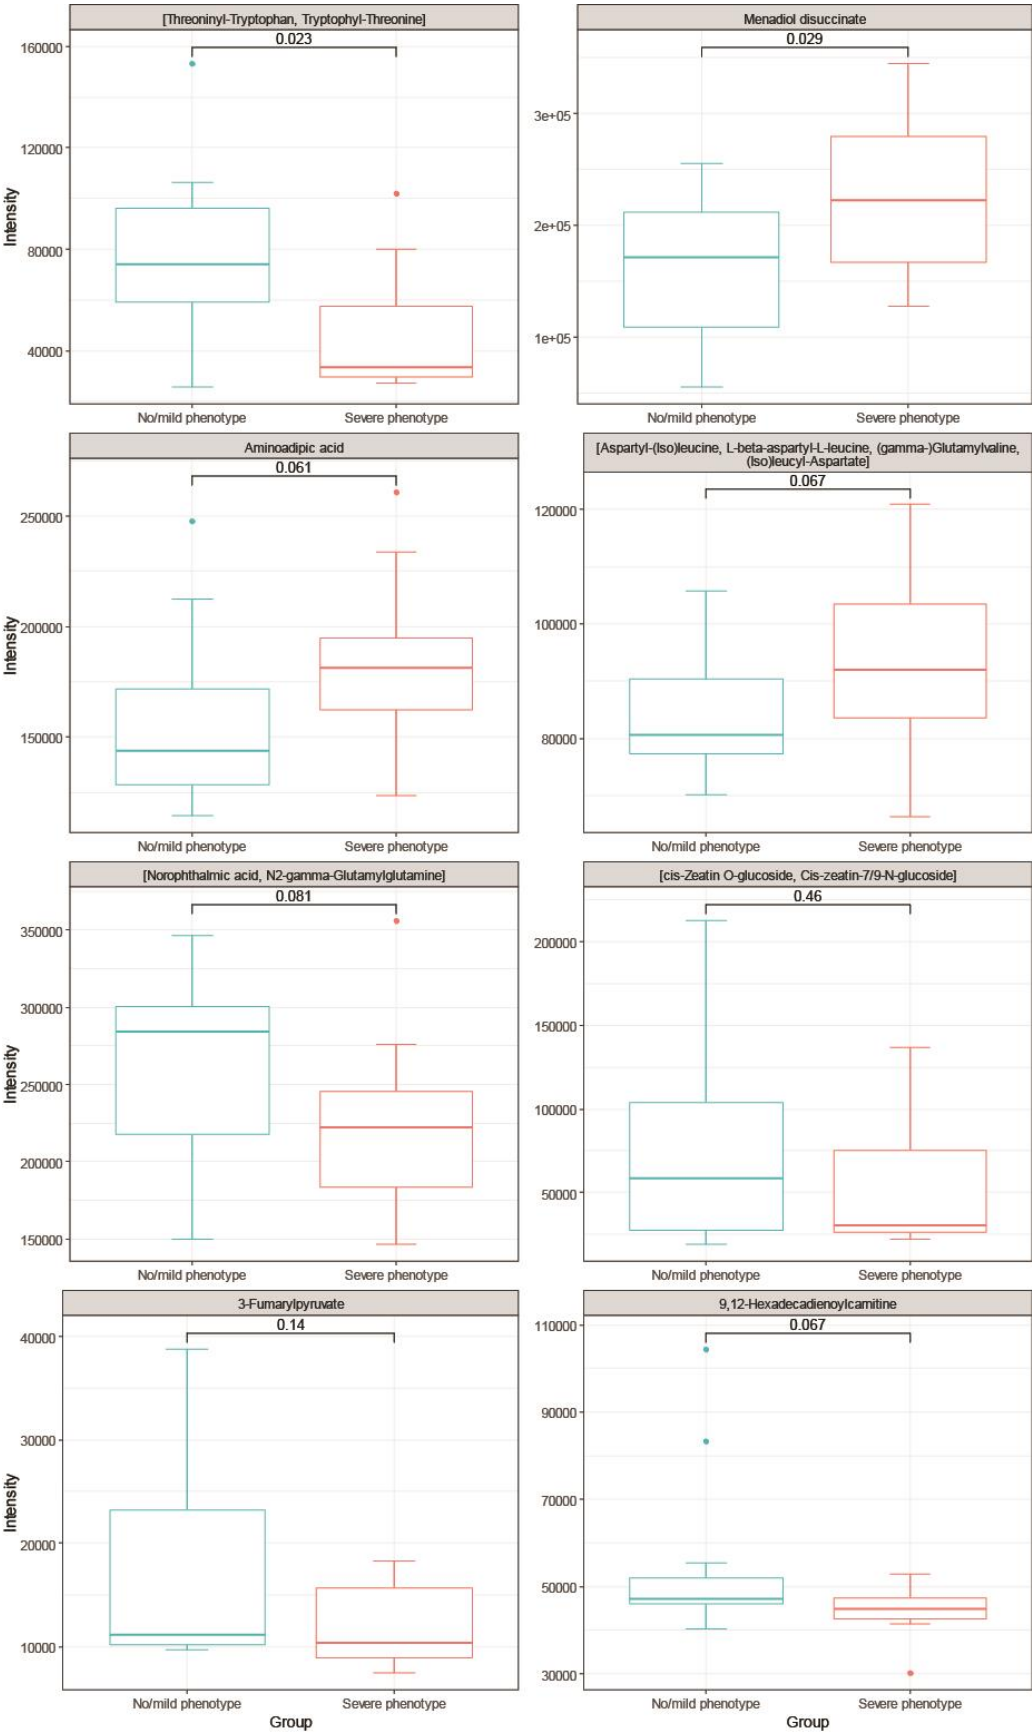

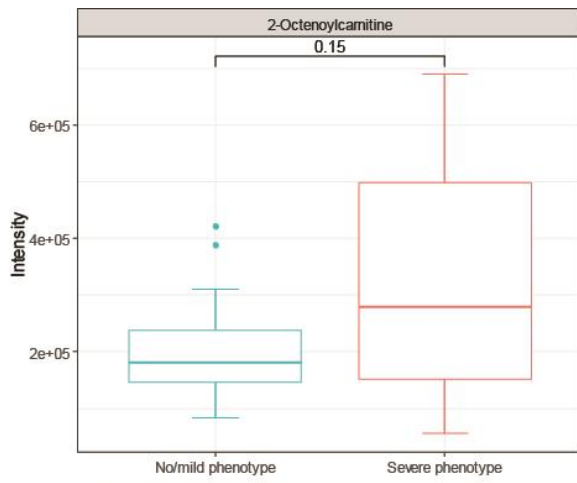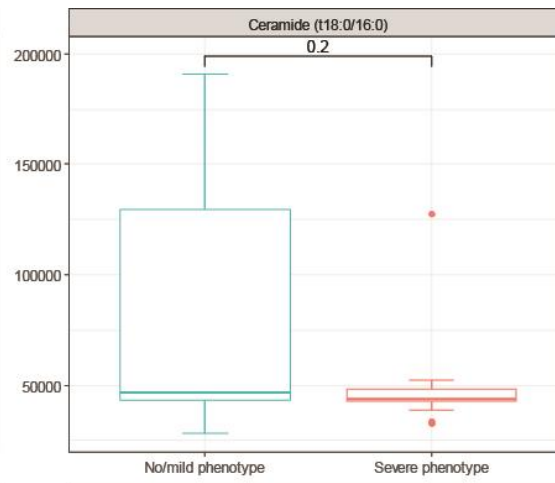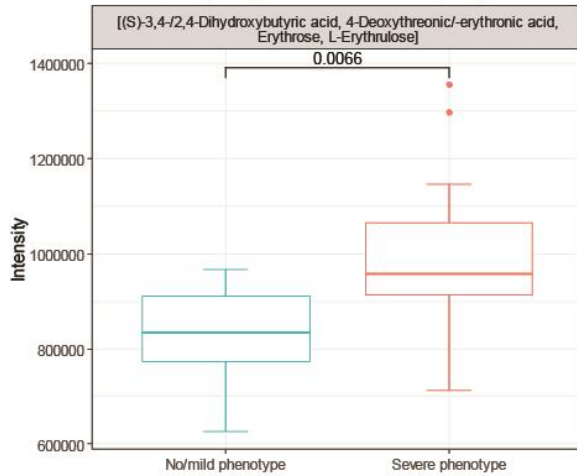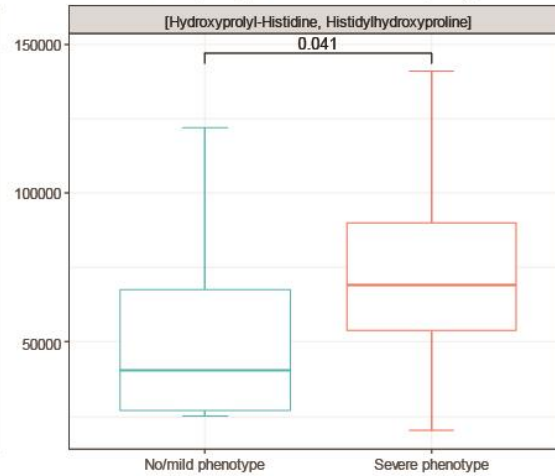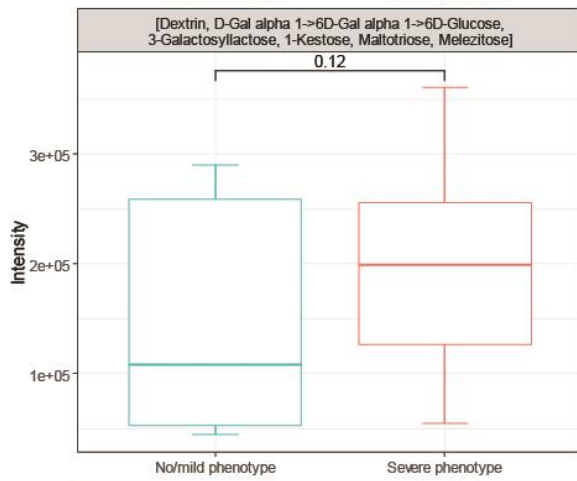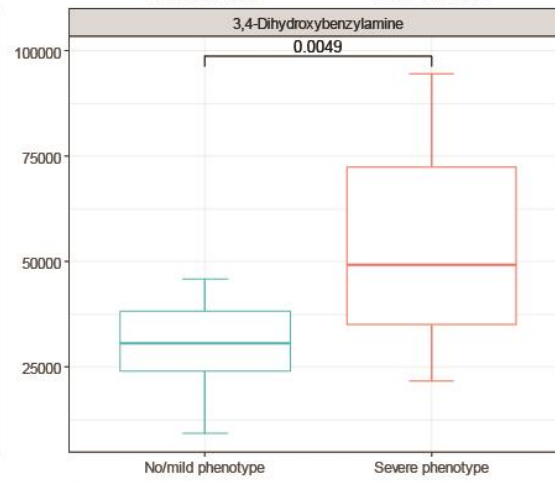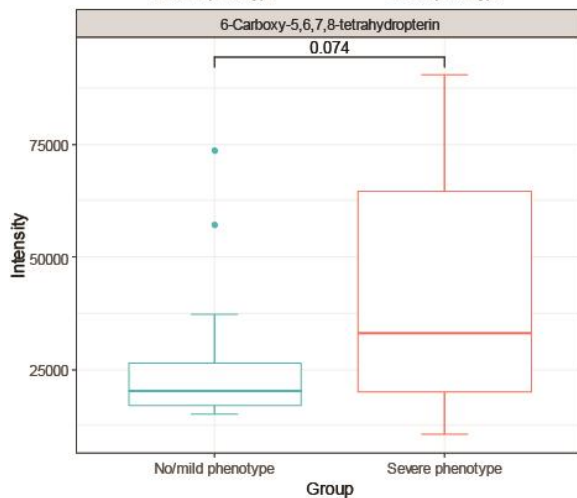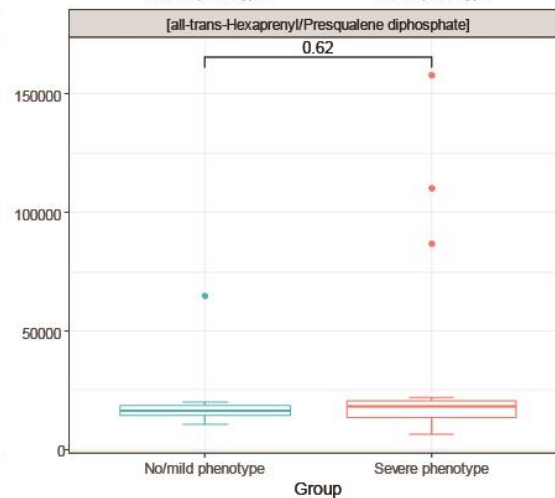

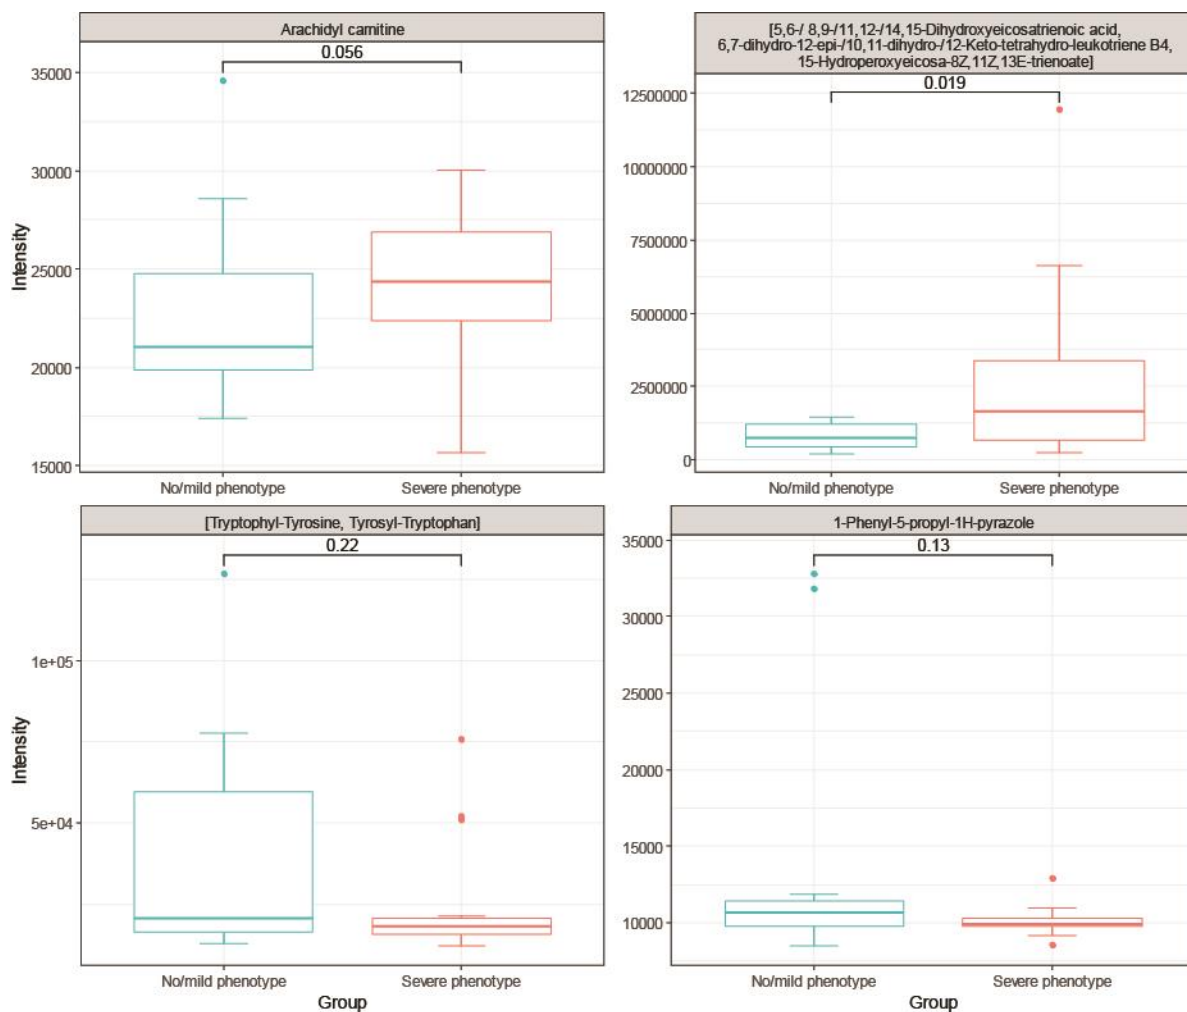

Box plots of the metabolites selected using Lasso logistic regression in the sensitivity analysis excluding subjects with heart failure. P-values are annotated for between group comparisons using Mann-Whitney U tests.



Figure S6. Box plots of selected peaks, excluding subjects with prior septal reduction therapy

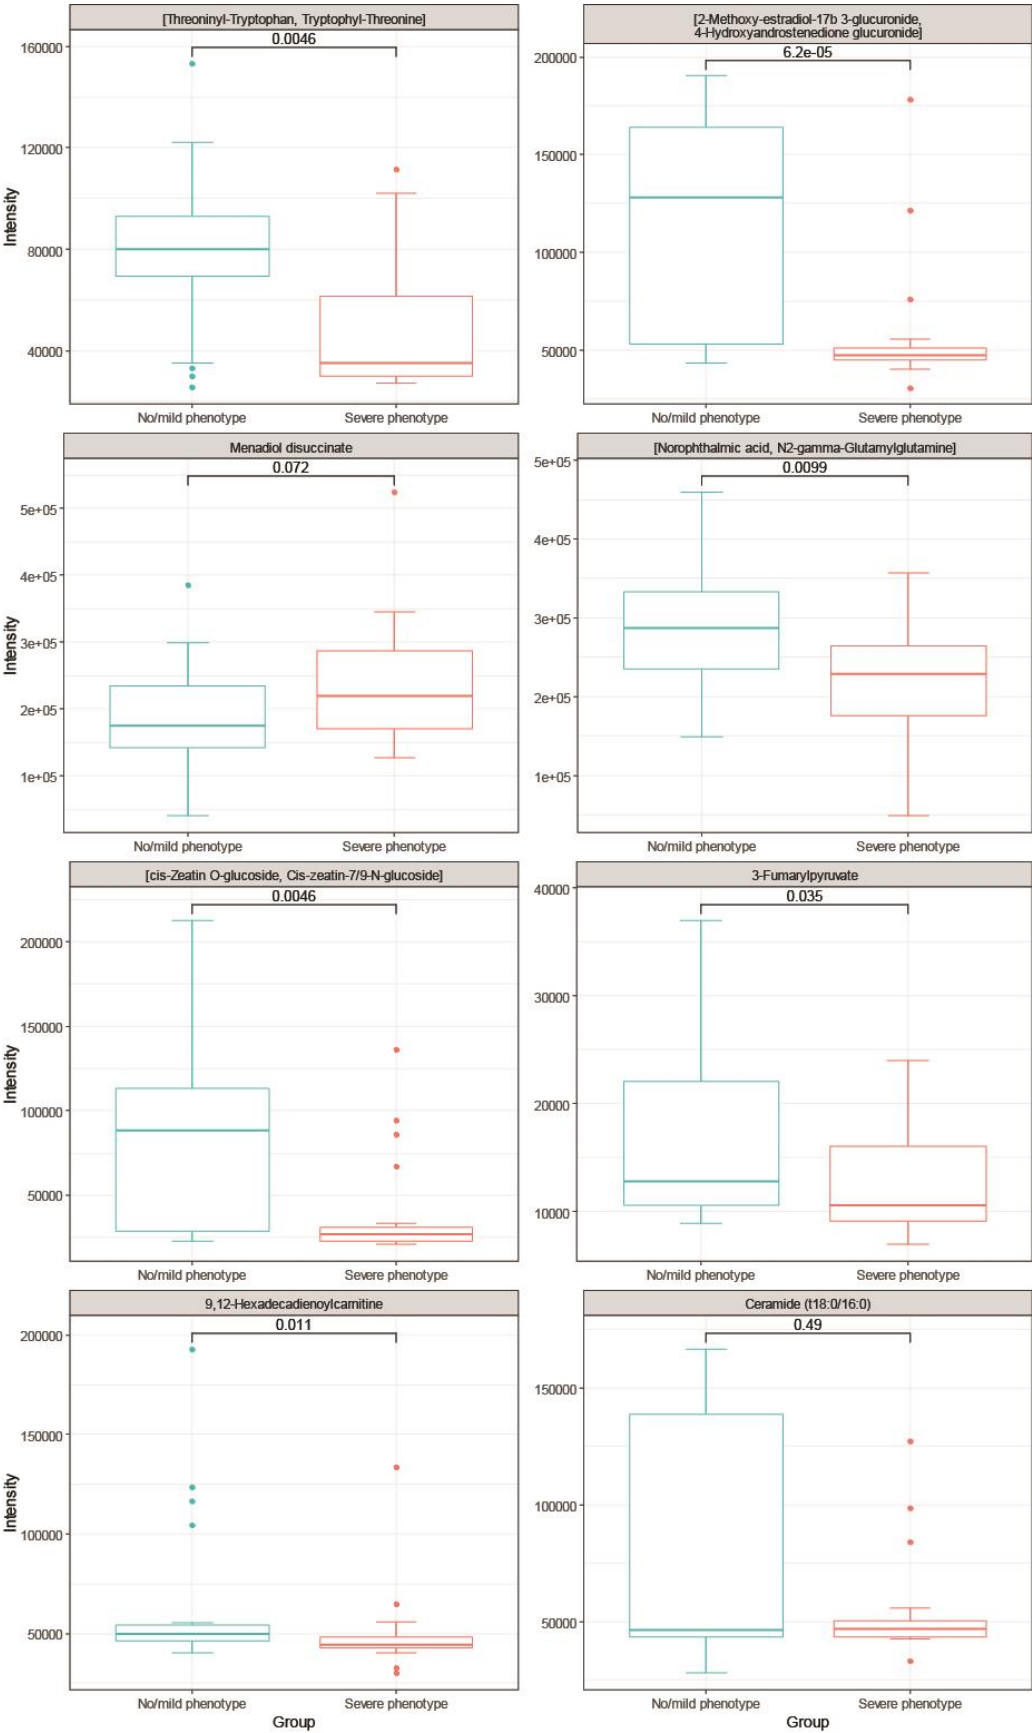

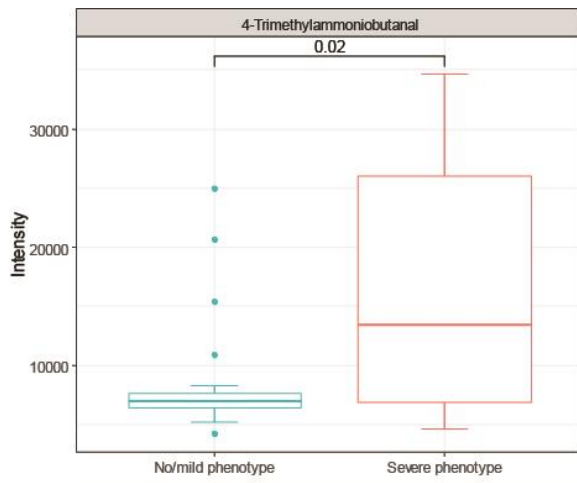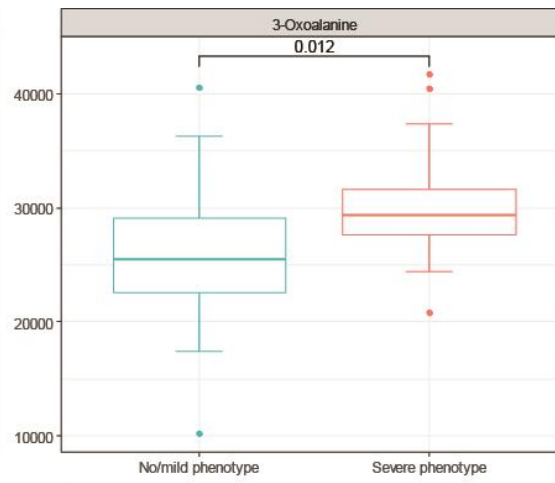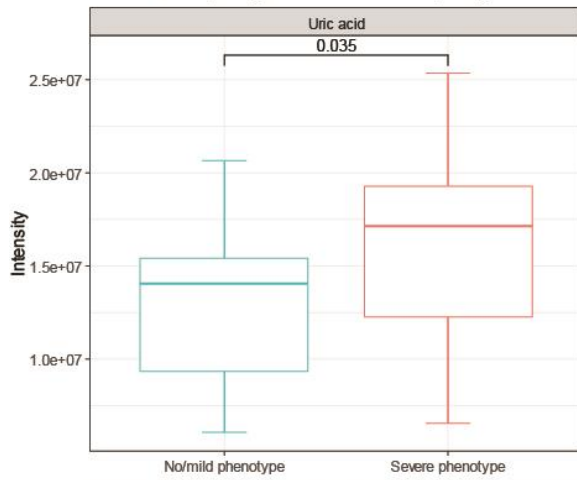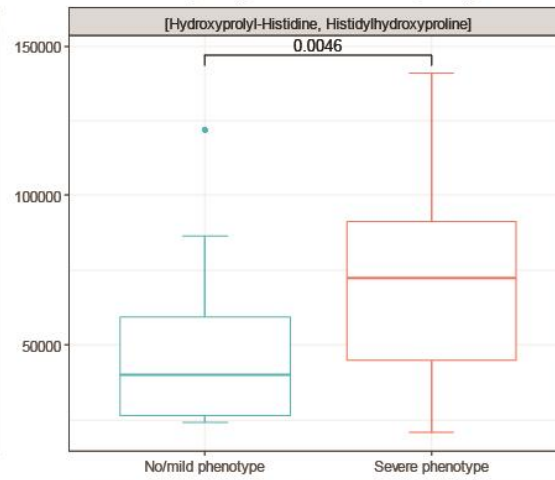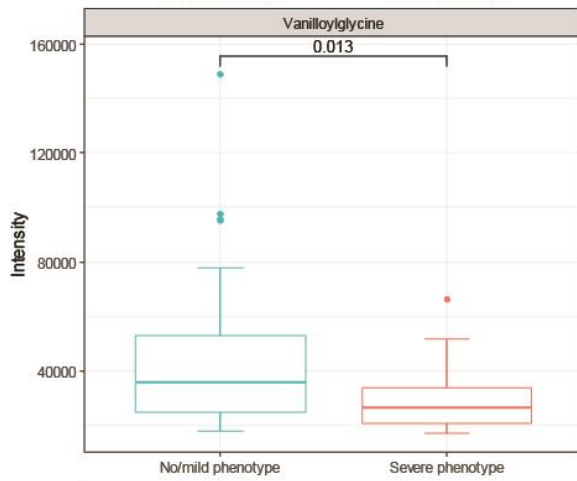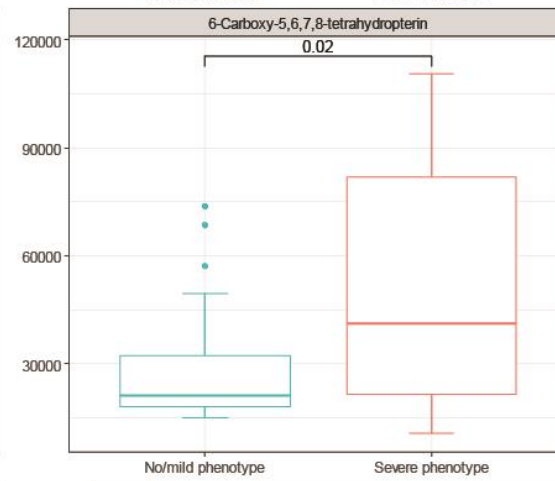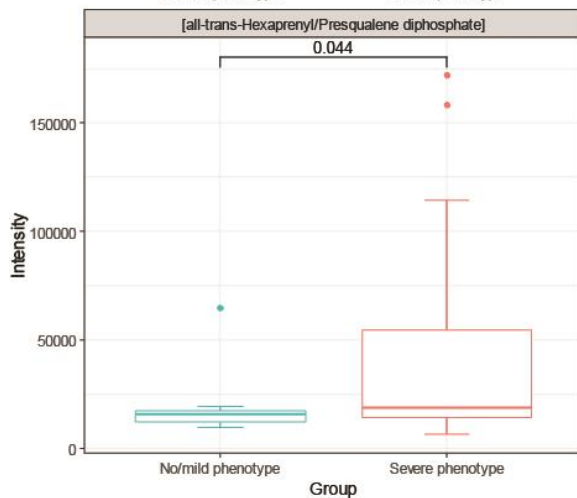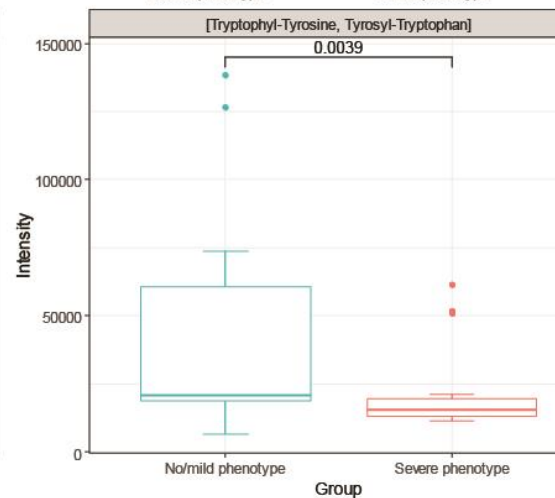

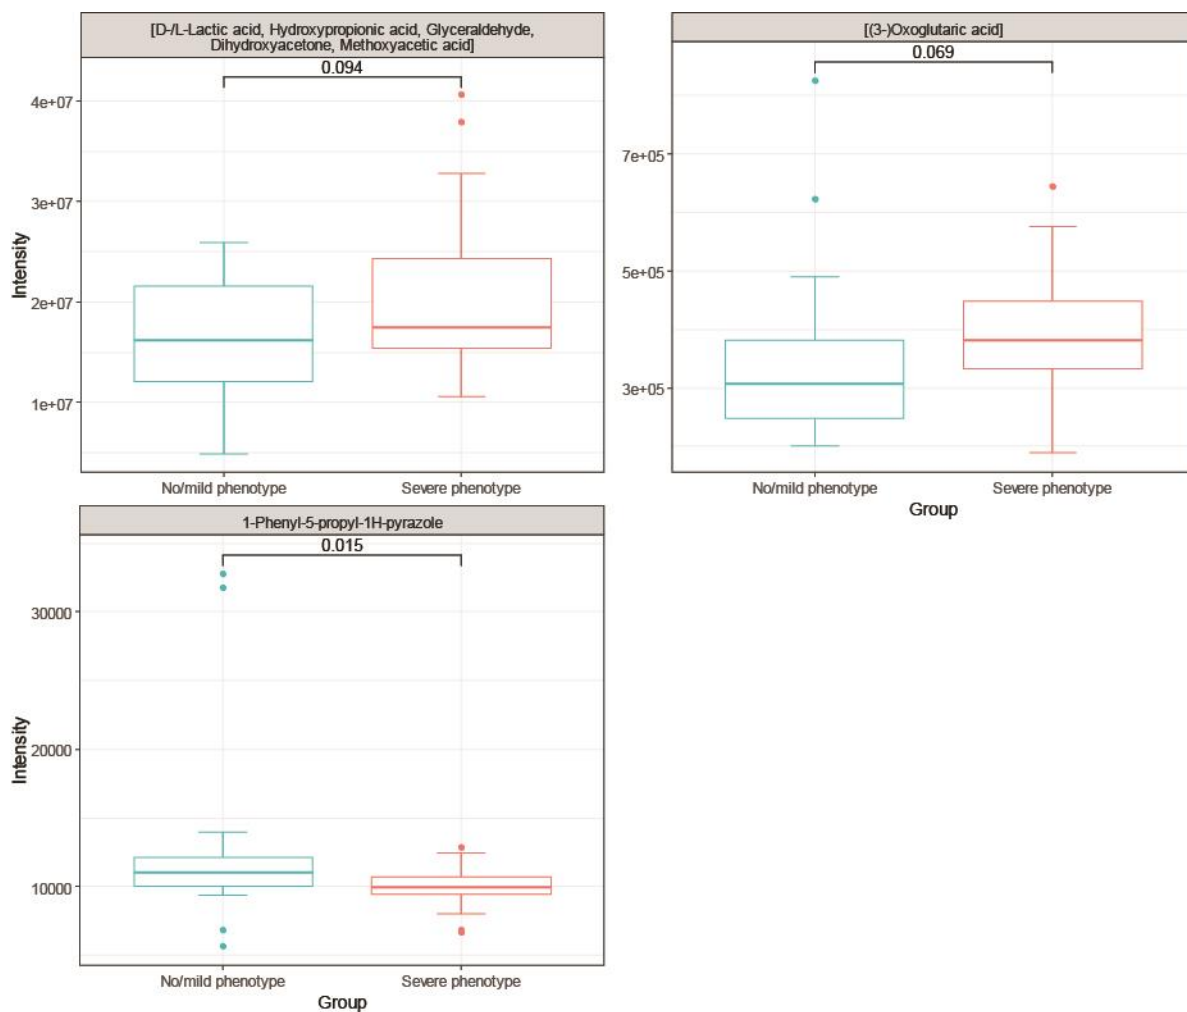

Box plots of the metabolites selected using Lasso logistic regression in the sensitivity analysis excluding subjects with prior septal reduction therapy. P-values are annotated for between group comparisons using Mann-Whitney U tests.
